# Supplementary material for: Delineation of Pathogenomic Insights of Breast Cancer in Young Women
Source: MDPI journal article supplement (doi:10.3390/cells11121927), 2022-06-15
Supplement: s1 [file s1]

---

## **SUPPLEMENTARY FILE**

### **Delineation of Pathogenomic Insights of Breast Cancer in Young Women**

**Aswathy Mary Paul, Bijesh George, Sunil Saini, Madhavan Radhakrishna Pillai,  
Masakazu Toi, Luis Costa and Rakesh Kumar**

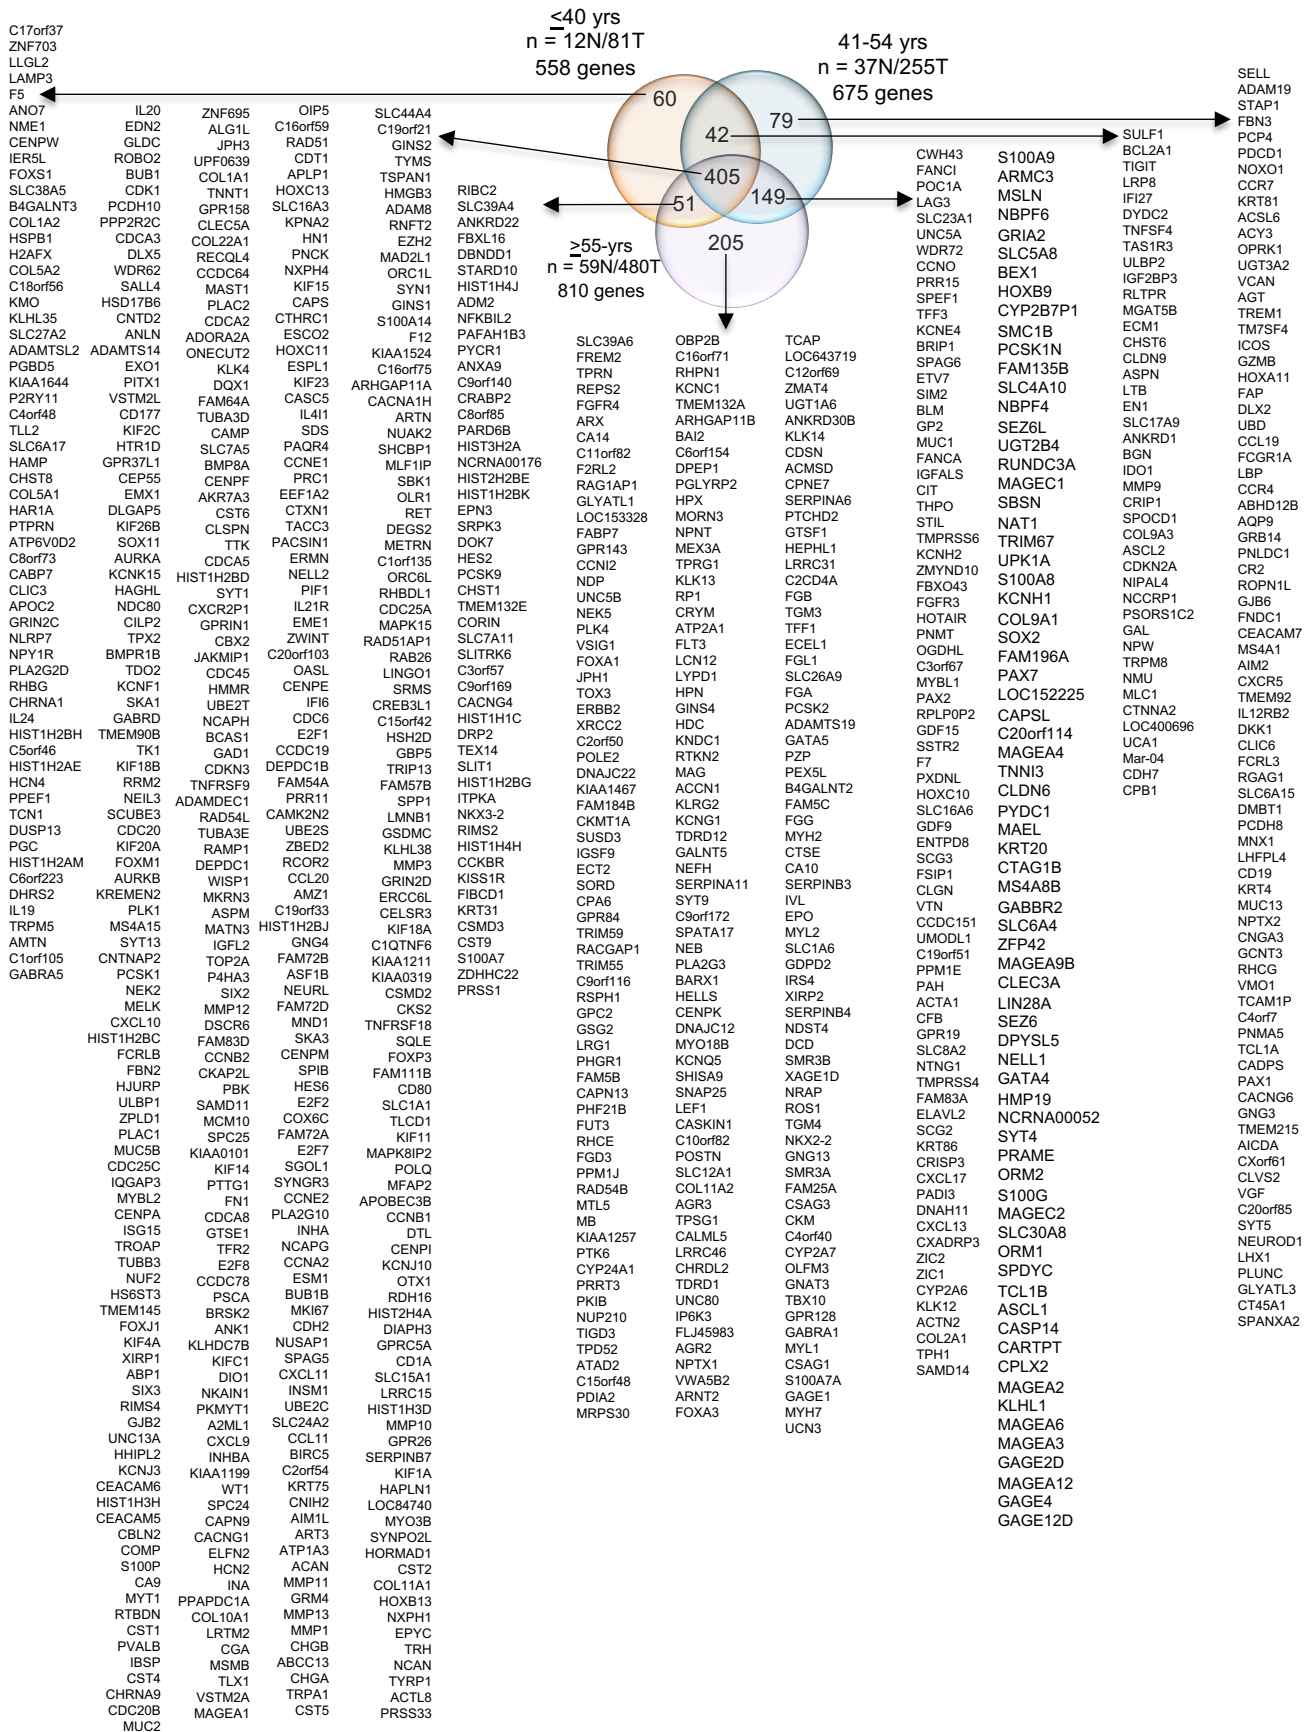

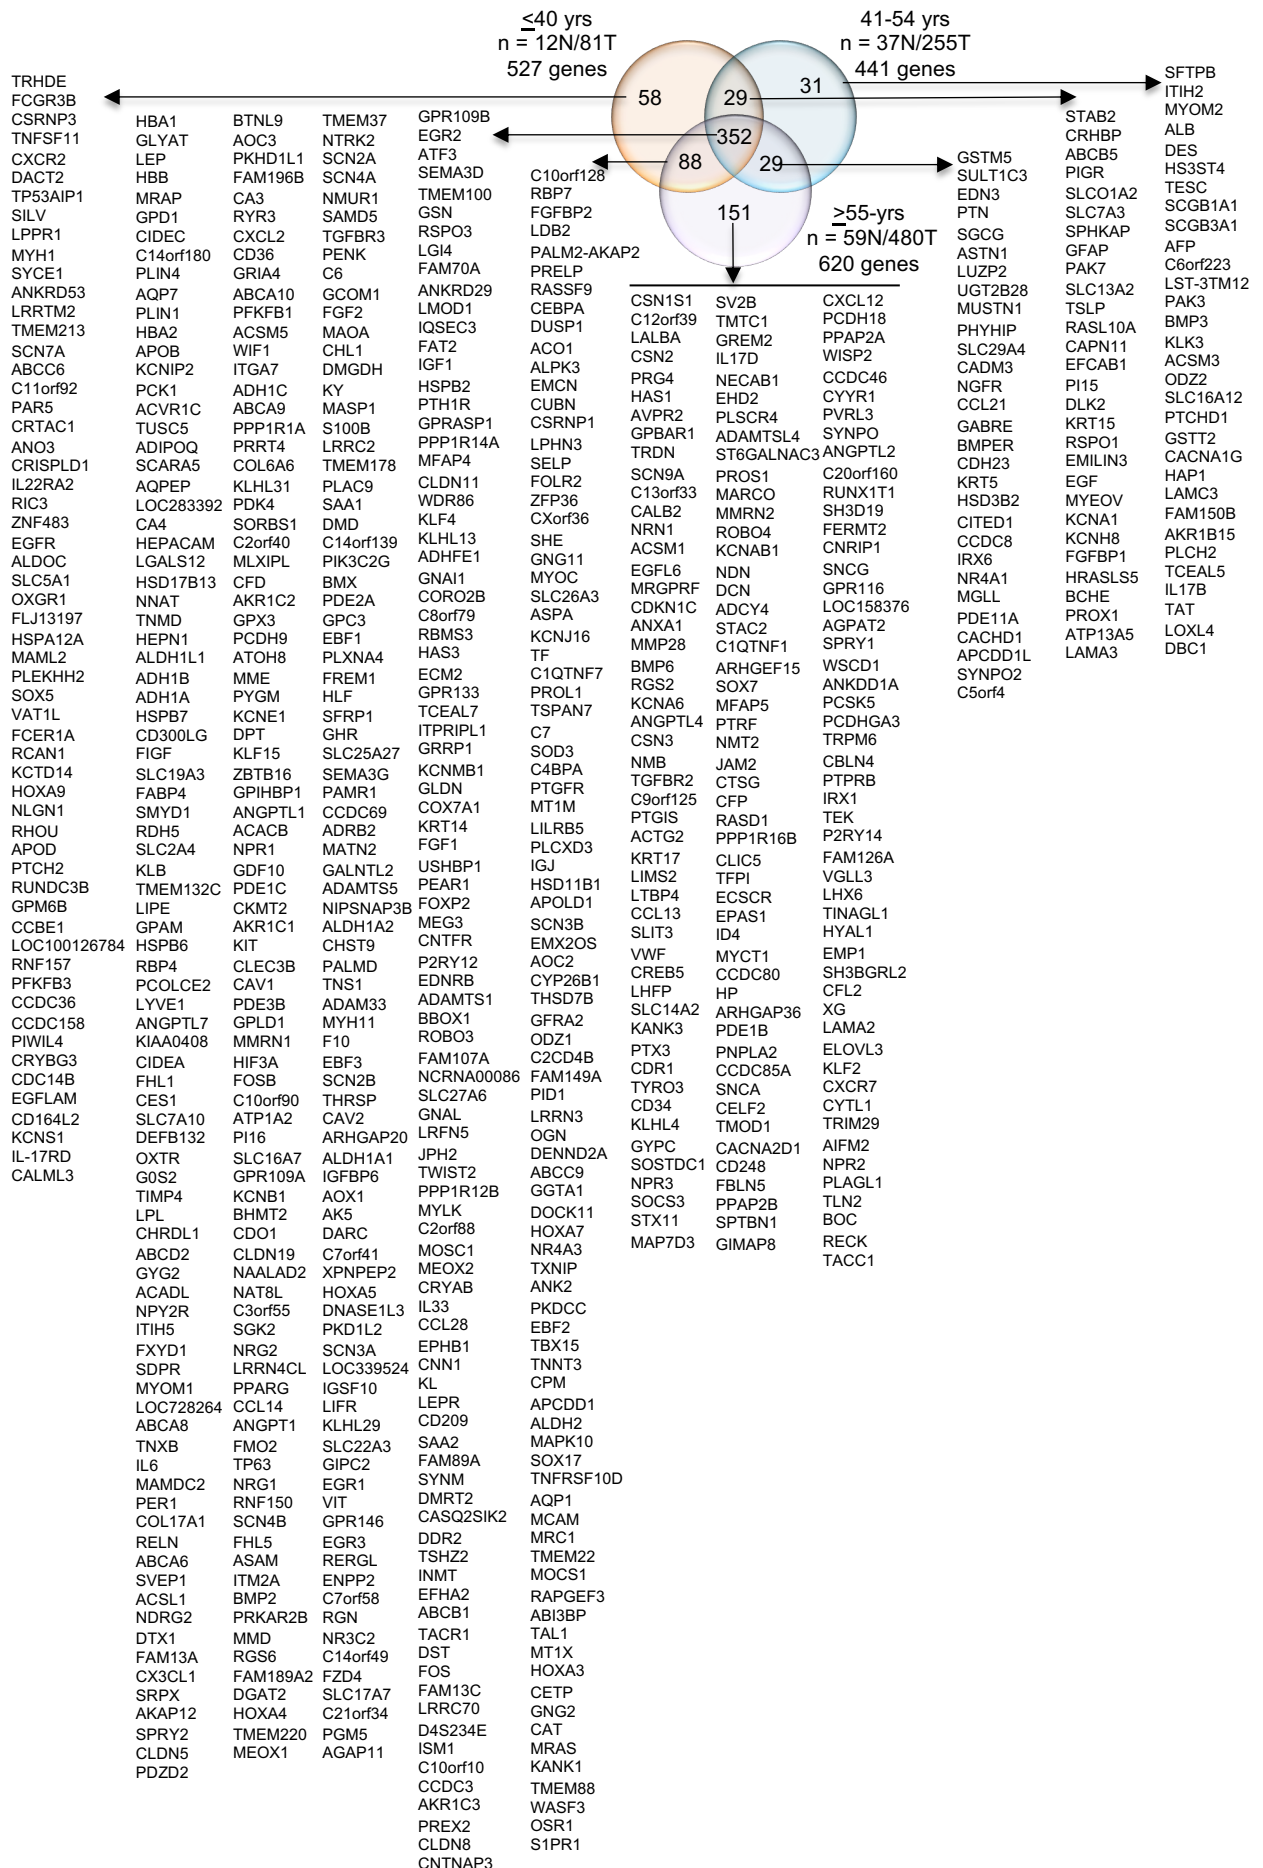

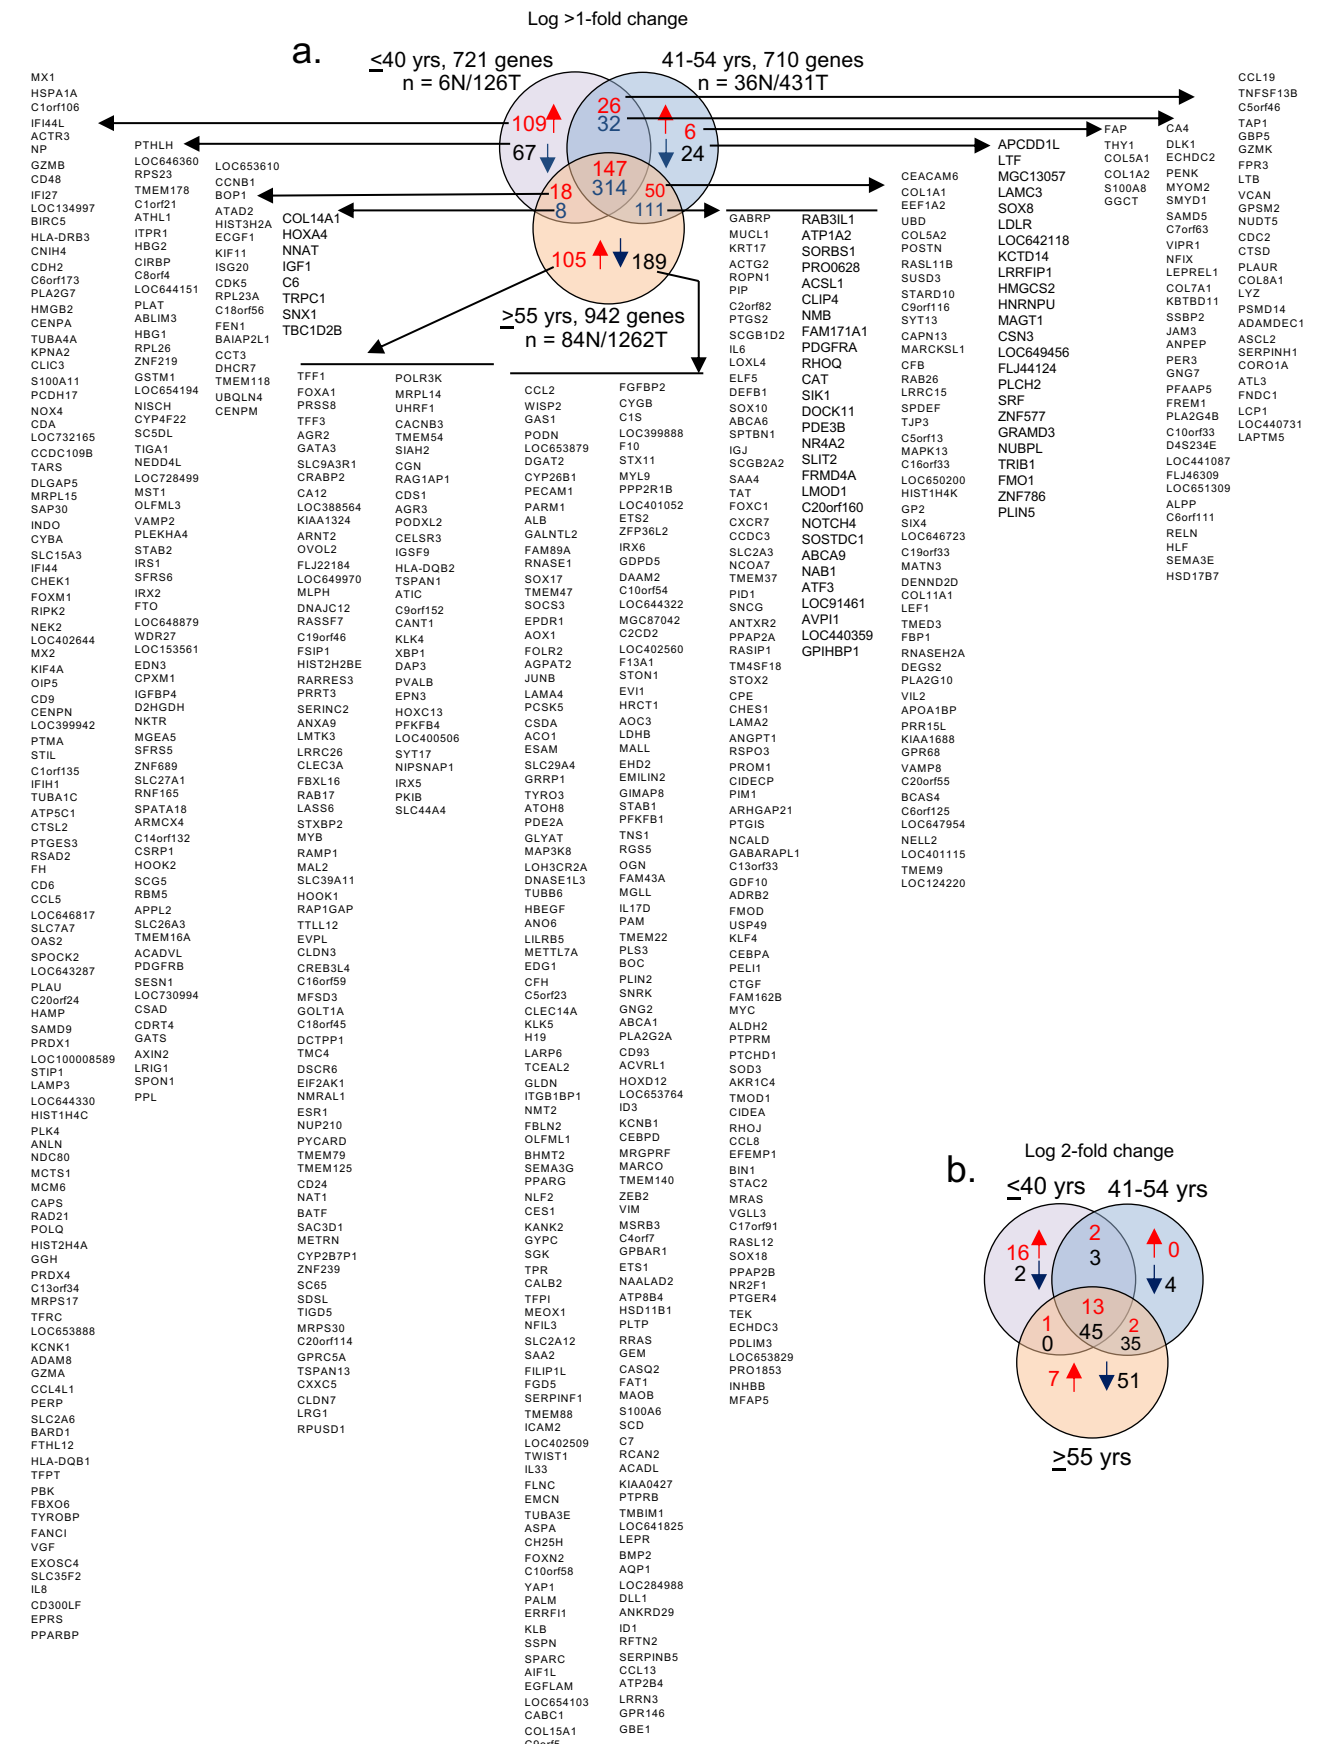

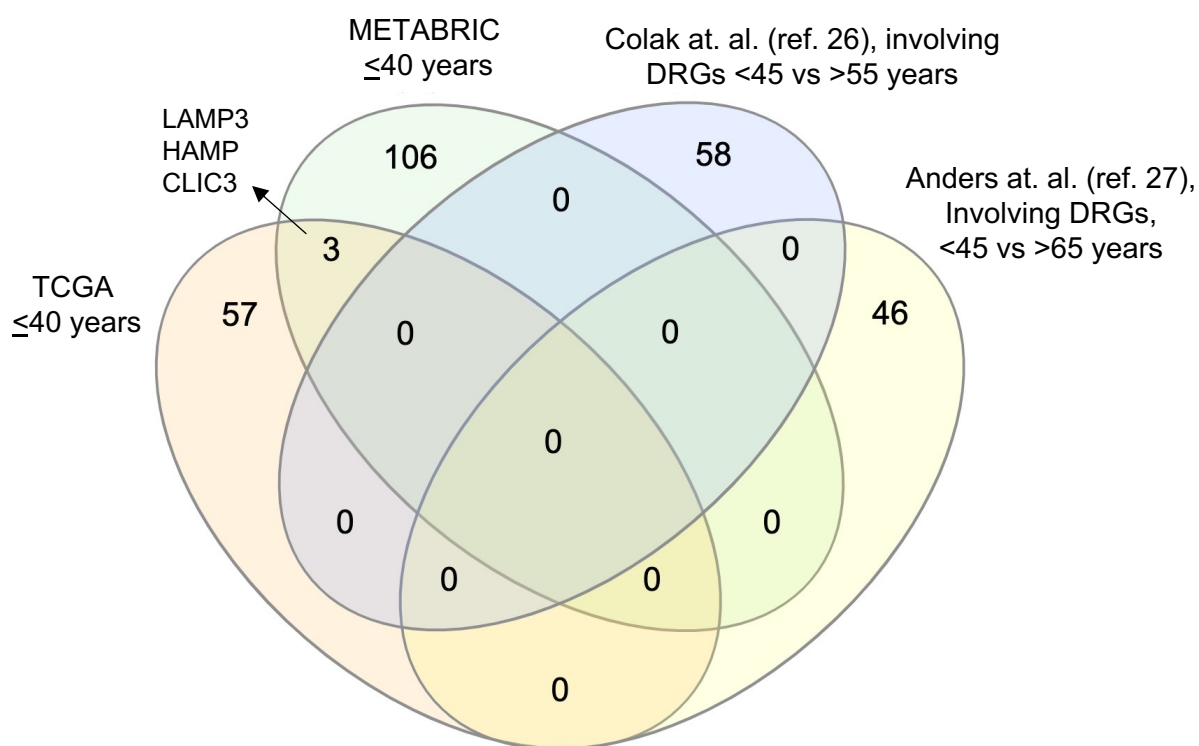

**Supplementary Figure S4:** Overlap of upregulated genes among four sets of differentially expressed genes reported in young women breast cancer.

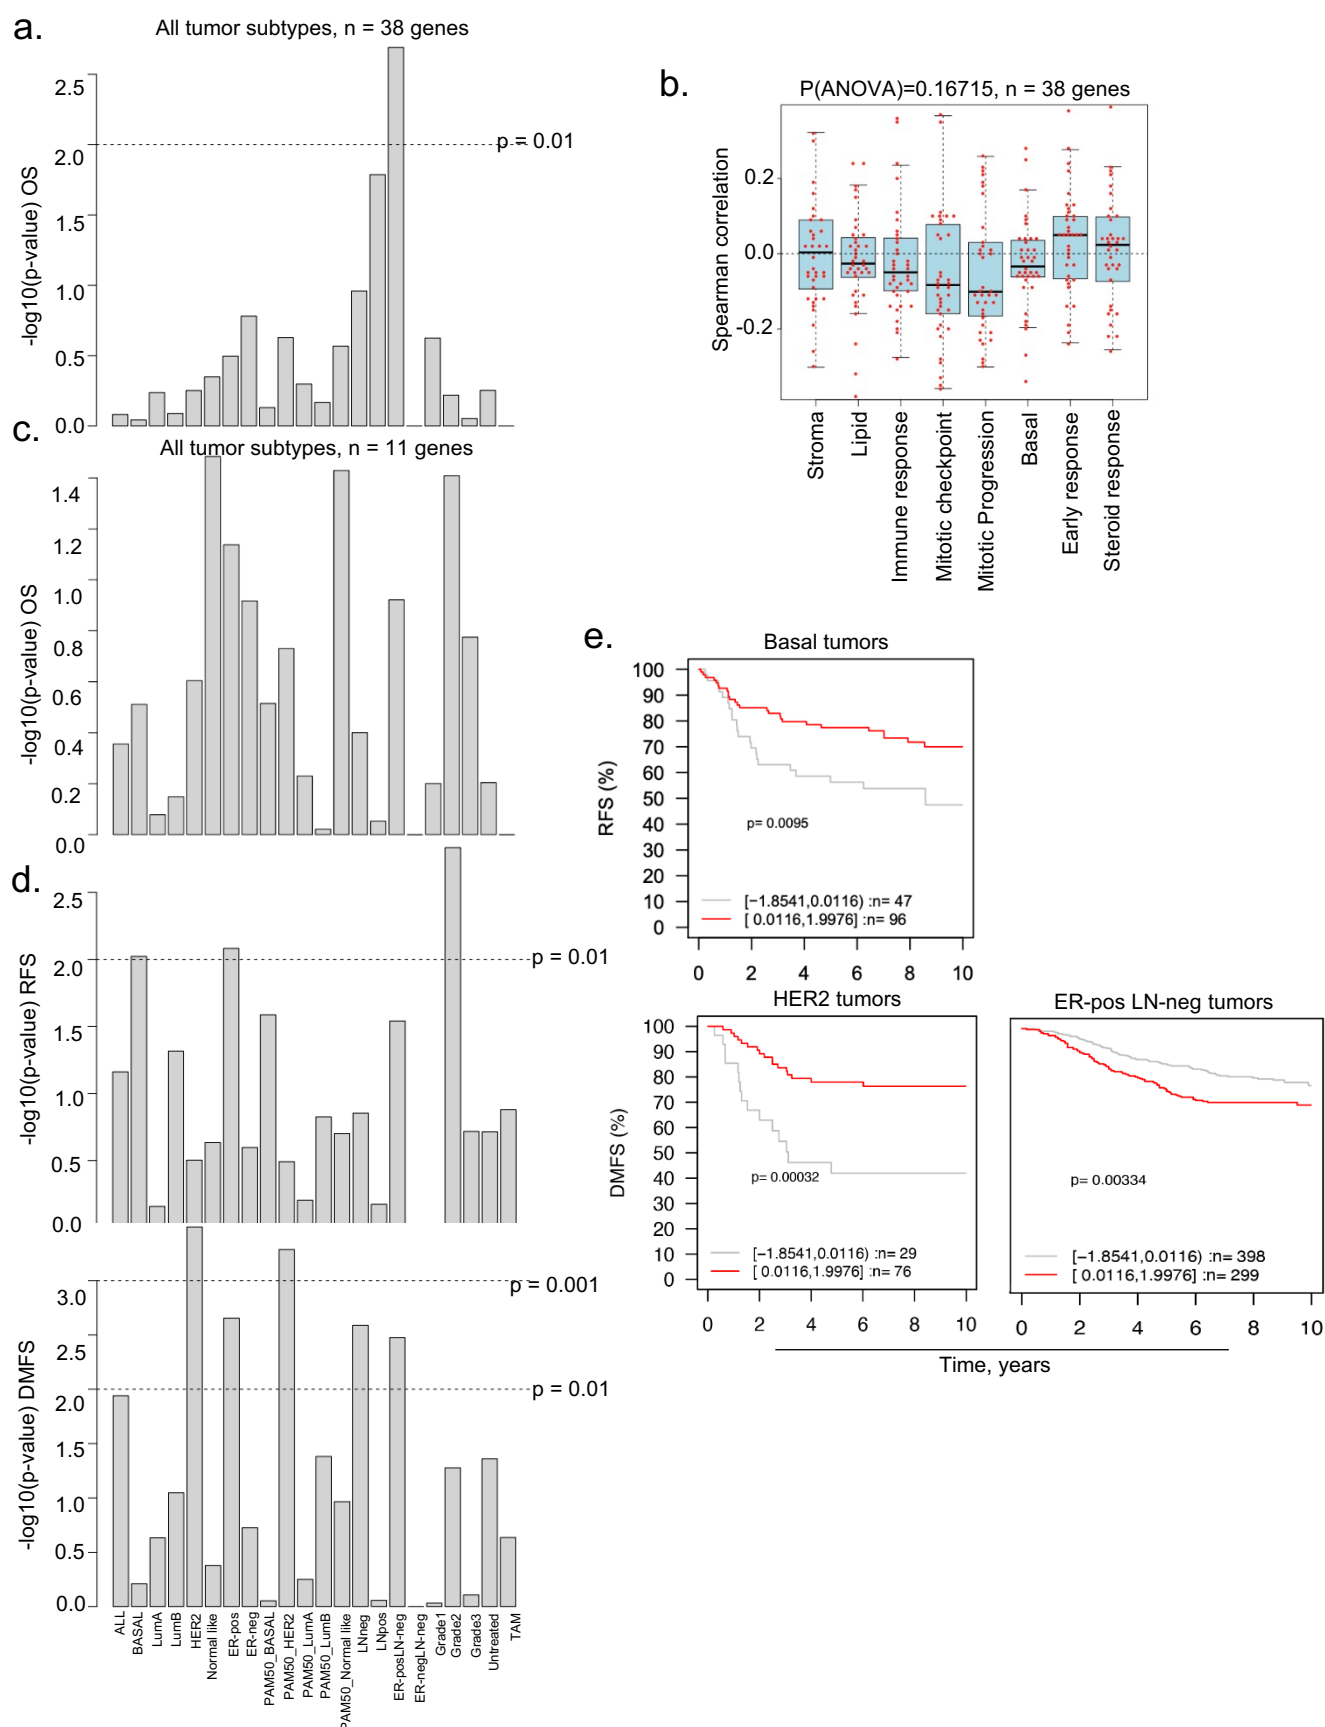

**Supplementary Figure S5:** Clinical significance of a subset of upregulated genes specific to  $\leq 40$  years with no overlaps with other age-groups. **a**, Kaplan-Meier OS summary of 38 out of 60 upregulated genes mapped in GOBO database with 1881 breast tumors; **b**, spearman correlation analysis of 38 genes in the context of co-expressed 8 gene modules; **c** and **d**, Kaplan-Meier OS, RFS and DMFS summaries of 11 out of 17 shortlisted genes in Fig. 1e, mapped in the GOBO database with 1881 breast tumors; **e**, RFS and DMFS curves using the high (red) and low (gray) expression of 11 genes for indicated breast tumor subtypes. All survival, correlation analysis performed using the online GOBO tools.

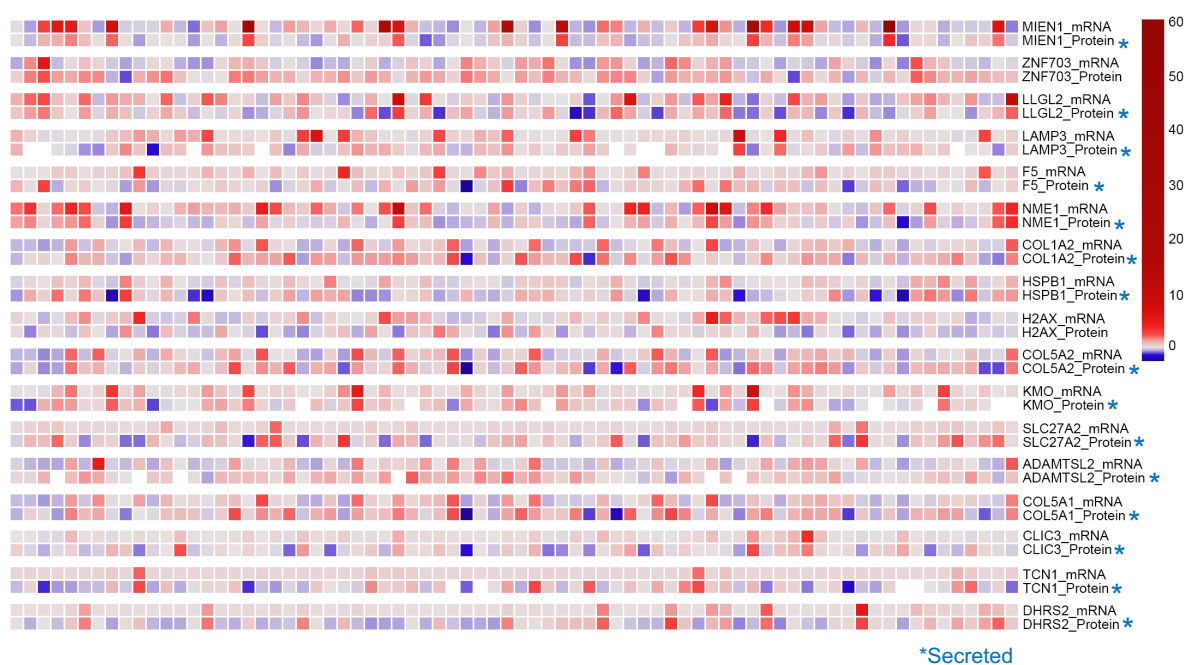

**Supplementary Figure S6:** Heatmap representing the expression of indicated at the levels of mRNA and protein in the same set of TCGA breast cancer samples, using the dataset curated from the cBioPortal platform.

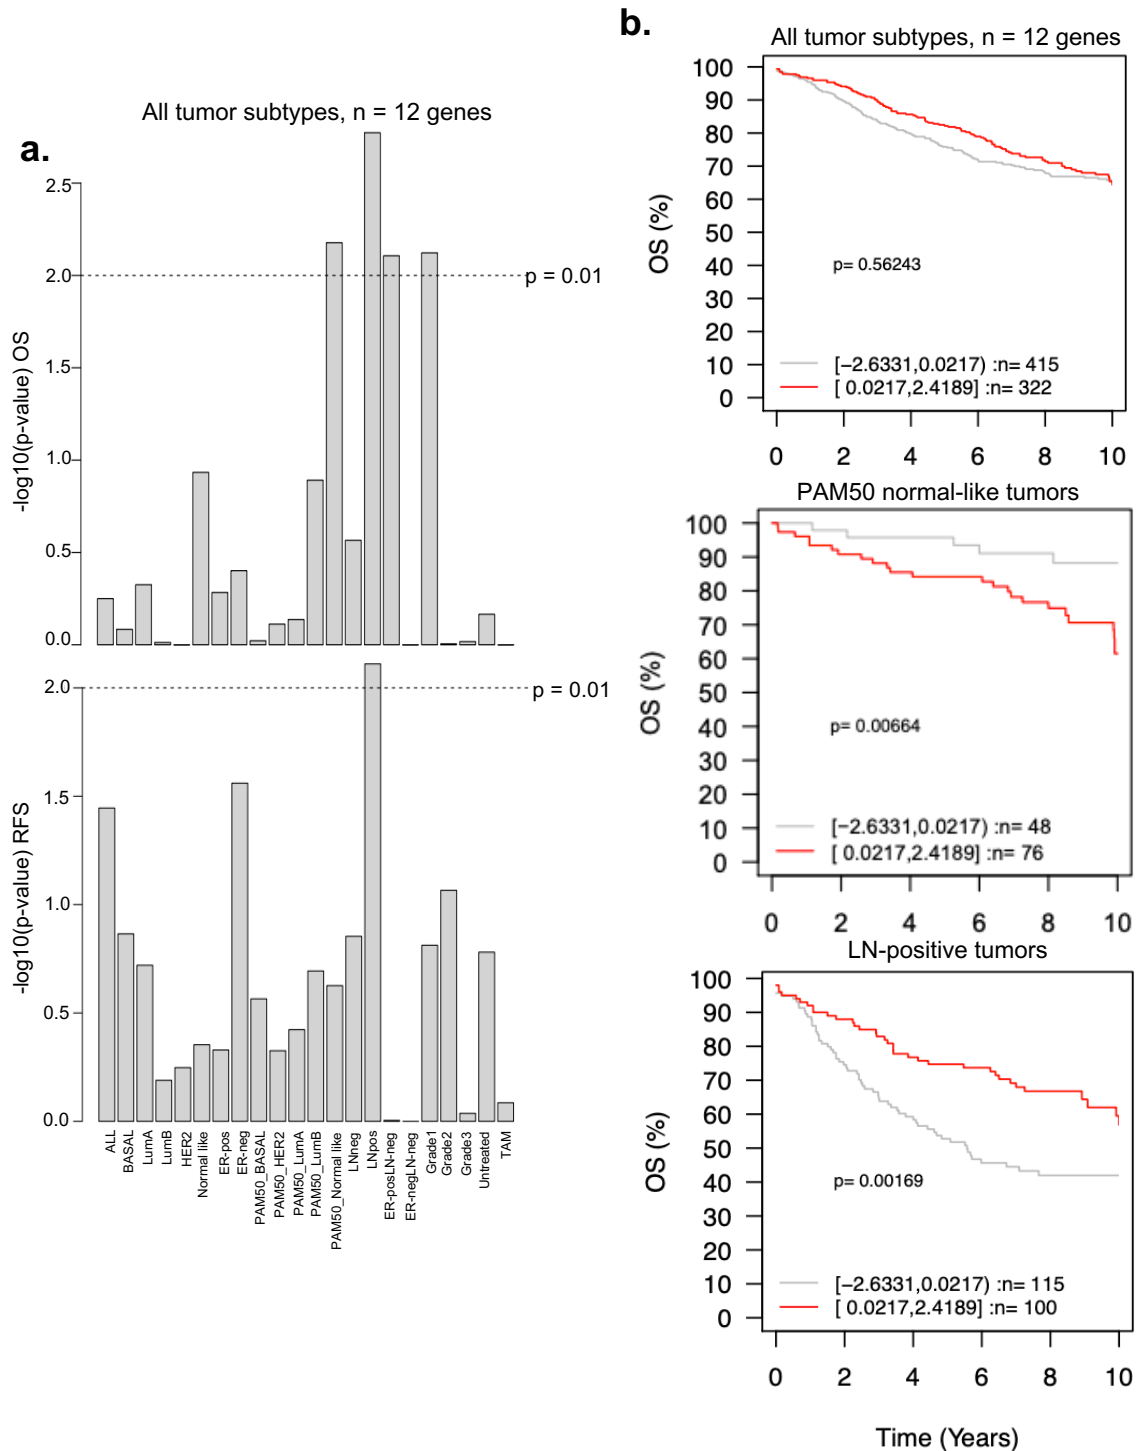

**Supplementary Figure S7:** Examples of genes upregulated in breast tumors but downregulated in adjacent normal breast tissues. **a**, Kaplan-Meier OS and RFS summaries of 12 out of 20 upregulated genes in Fig. 2b. **b**, OS curves using the high (red) and low (gray) expression of 12 genes for all tumor sub-types, PAM50 normal-like tumors and LN-positive tumors. All survival, correlation analysis performed using the online GOBO tools.



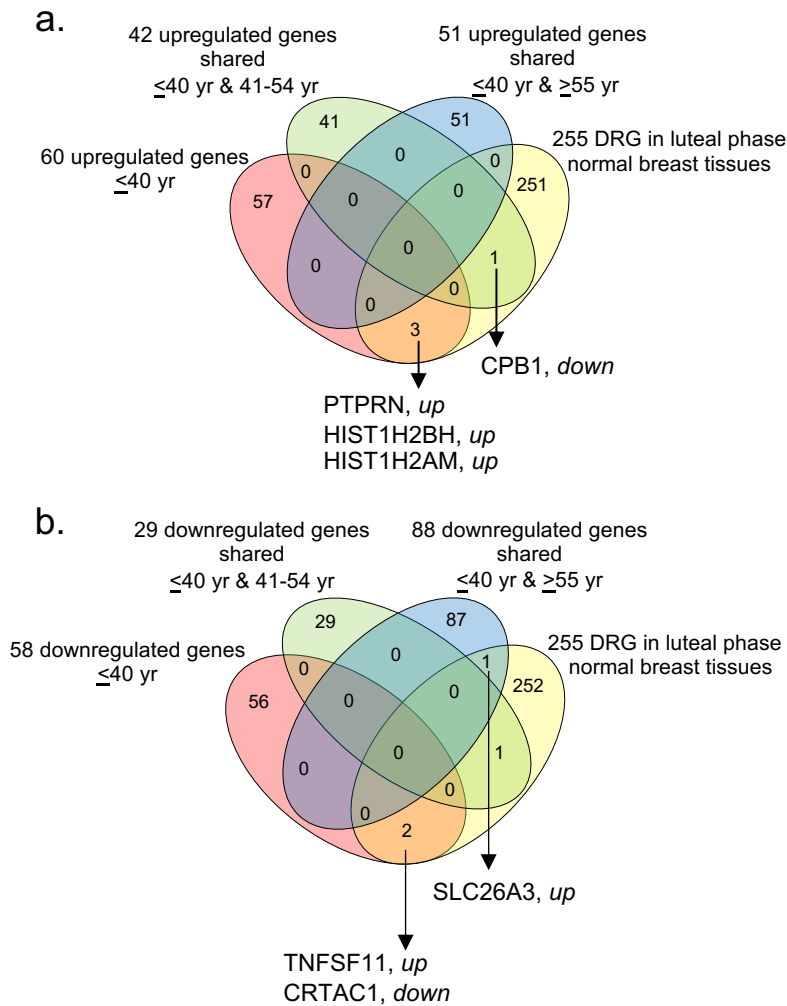

**Supplementary Figure S8:** Dysregulated genes in BCYW aged  $\leq 40$  years with DEGs specific to the menstrual cycle phases. **a**, overlap among DRGs in normal breast tissues during the luteal phase of the menstrual cycle and upregulated in breast tumors from women aged  $\leq 40$  years or shared with women between the  $\leq 40$  and 41 - 54 years or  $\leq 40$  and  $\geq 55$  years. **b**, overlap among DRGs in normal breast tissues during the luteal phase of the menstrual cycle and downregulated u in breast tumors from women aged  $\leq 40$  years or shared with women between the  $\leq 40$  and 41 - 54 years or  $\leq 40$  and  $\geq 55$  years.

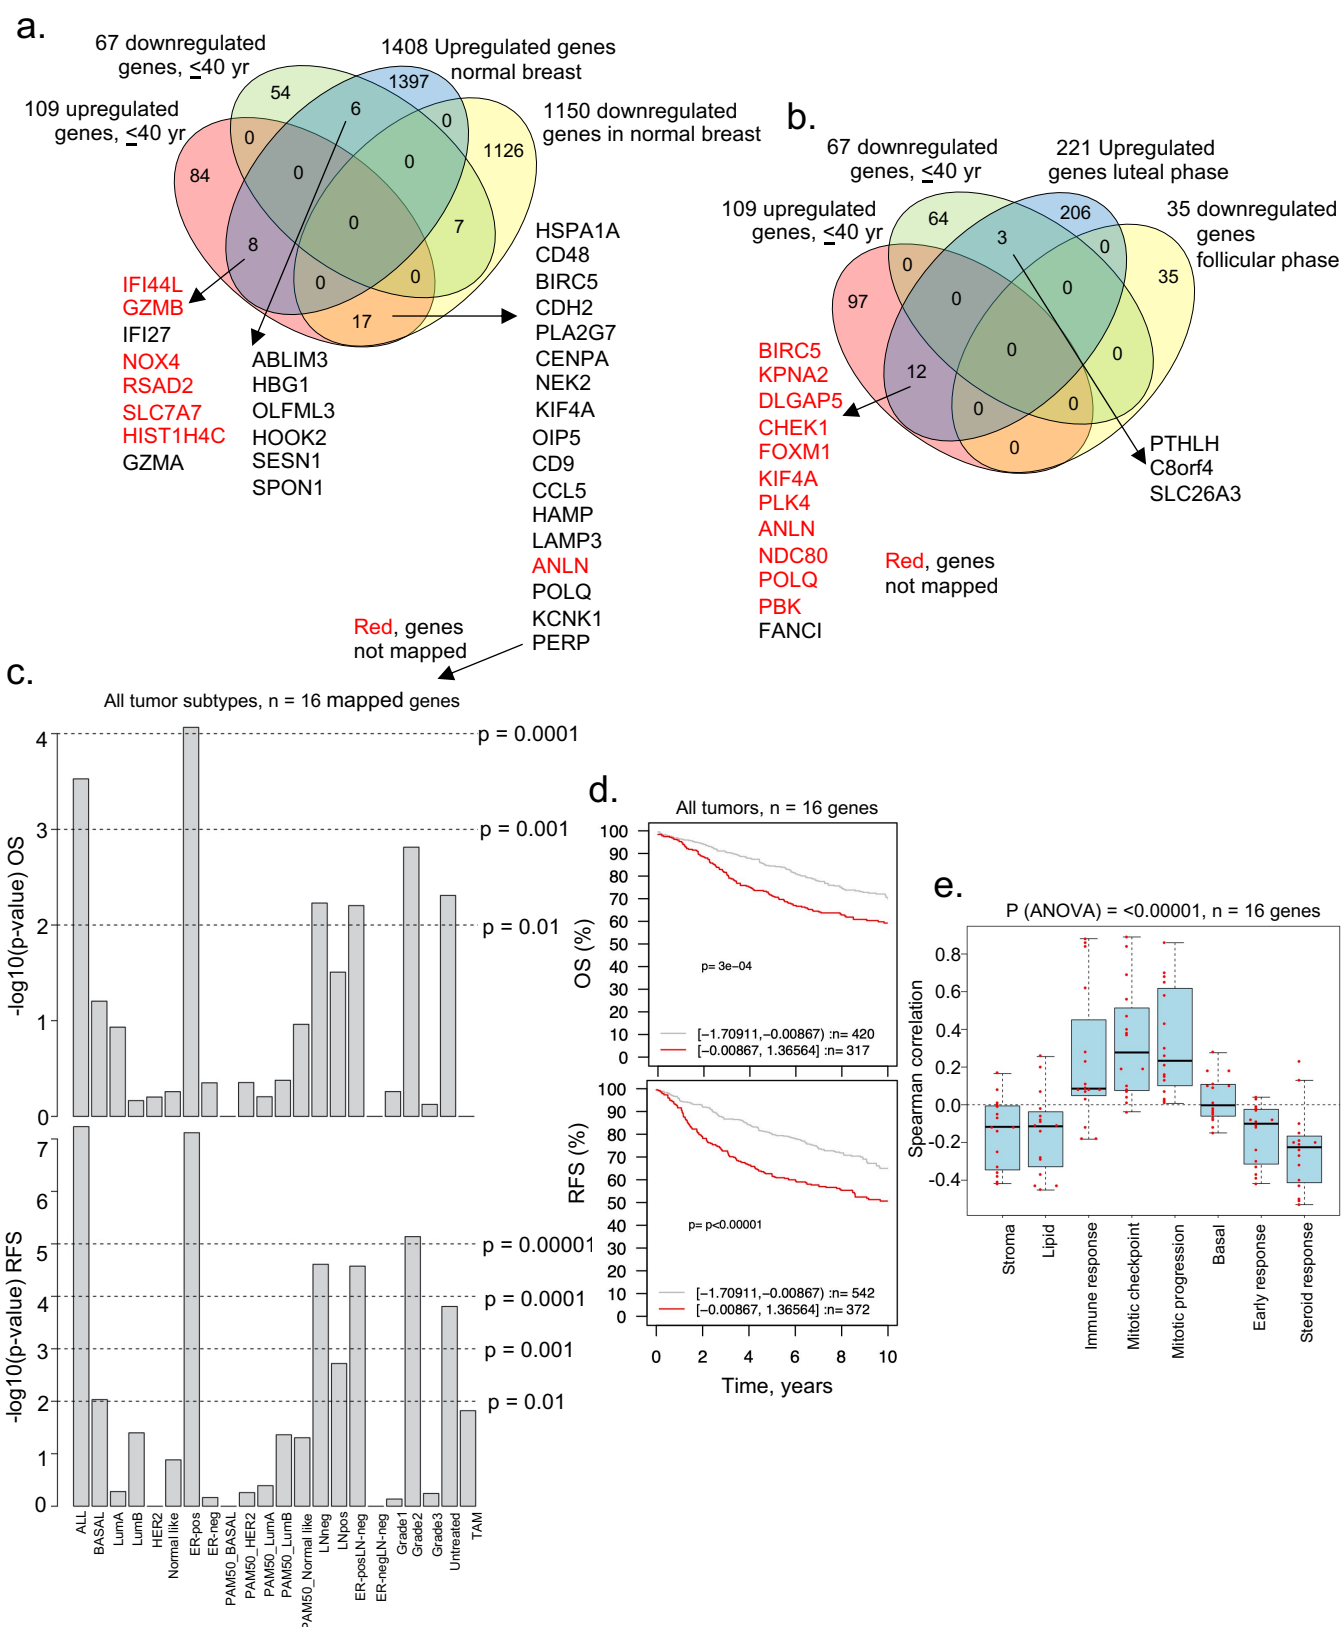

**Supplementary Figure S9:** Clinical significance of a subset of upregulated genes specific to  $\leq 40$  years in the METABRIC breast tumor dataset. **a**, Overlap of up- and down-regulated genes in patients aged  $\leq 40$  years and modulated genes in normal breast tissues; **b**, Overlap of up- and down-regulated genes in patients aged  $\leq 40$  years and DRGs in normal breast tissues from the luteal or follicular phases of the menstrual cycle; **c**, Kaplan-Meier OS and RFS summaries of 16 genes upregulated in breast tumors  $< 40$  years but downregulated in normal breast tissues; **d**, OS and RFS curves using the high (red) and low (gray) expression of 16 genes for all tumor subtypes. **e**, Spearman correlation analysis of 16 genes in the context of co-expressed 8 gene modules. All survival, correlation analysis performed using the online GOBO tools.

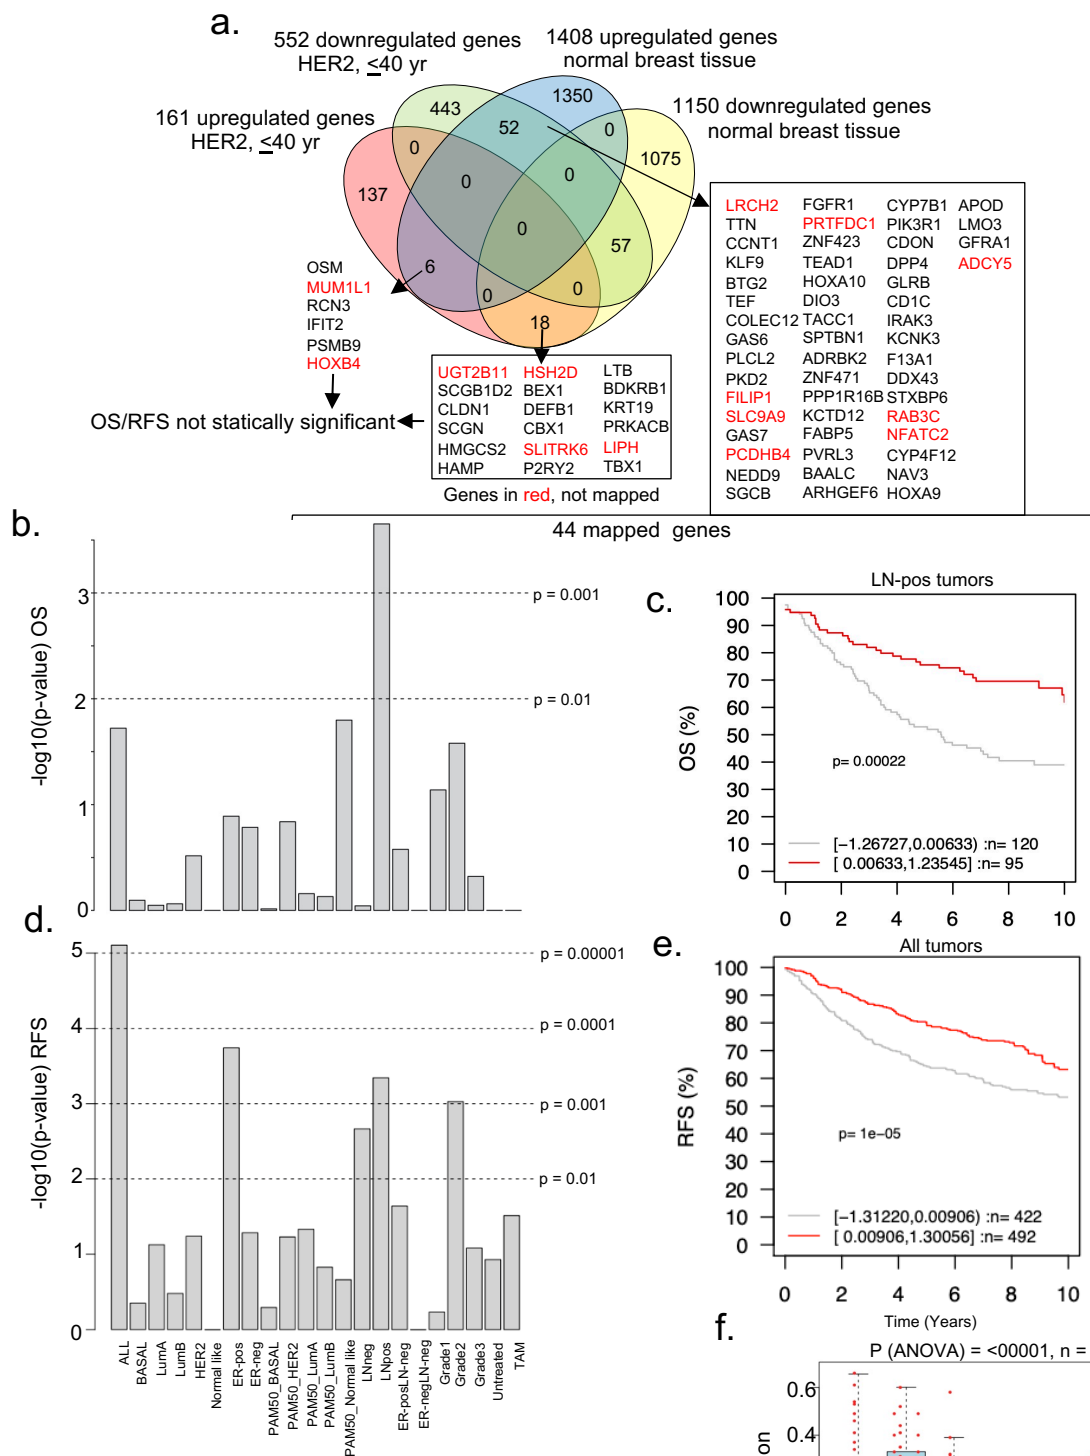

**Supplementary Figure S10: Status of BCYW genes in intrinsic HER2 breast tumor subtype. a,** Overlap of up- and down-regulated genes in HER2 breast tumors from patients aged  $\leq 40$  year with upregulated or downregulated genes in normal breast tissues; **b,** Kaplan-Meier OS summary of 44 genes downregulated in HER2 tumors but upregulated in normal breast tissues mapped in GOBO database with 1881 breast tumors; **c,** OS curve using the high (red) and low (gray) expression of 44 genes in LN-pos breast tumors; **d,** Kaplan-Meier RFS summary of 44 genes mapped in GOBO database with 1881 breast tumors; **e,** RFS curve using the high (red) and low (gray) expression of 44 genes in all tumor subtypes; and **f,** Spearman correlation analysis of 44 genes in the context of co-expressed 8 gene modules. All survival, correlation analysis performed using the the GOBO online tools.

a.

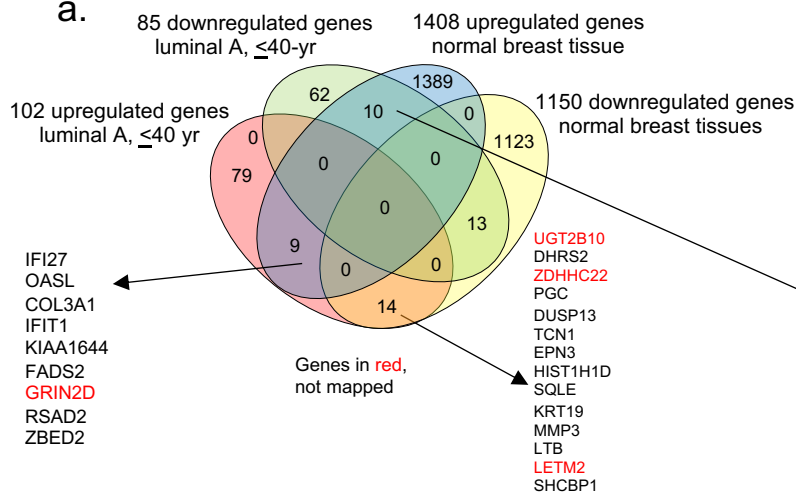

b.

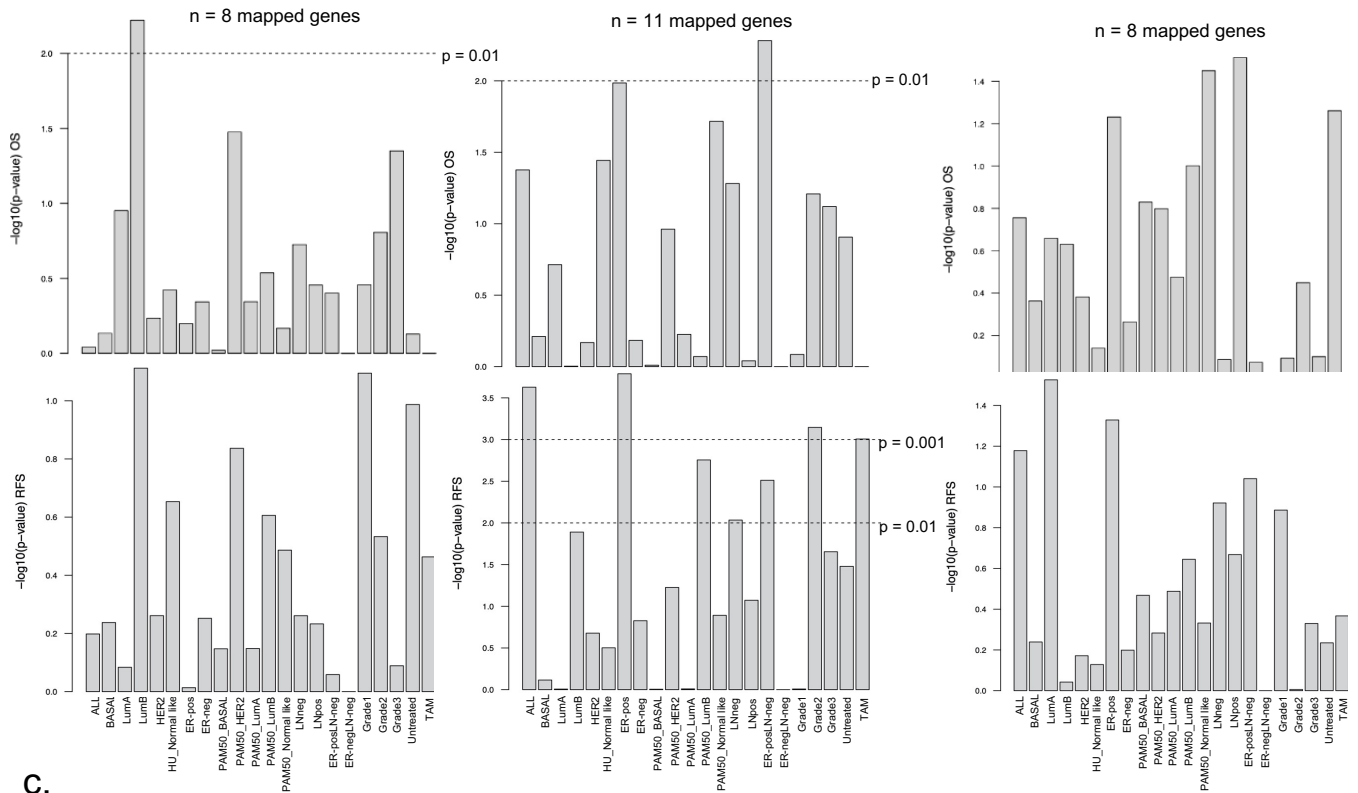

c.

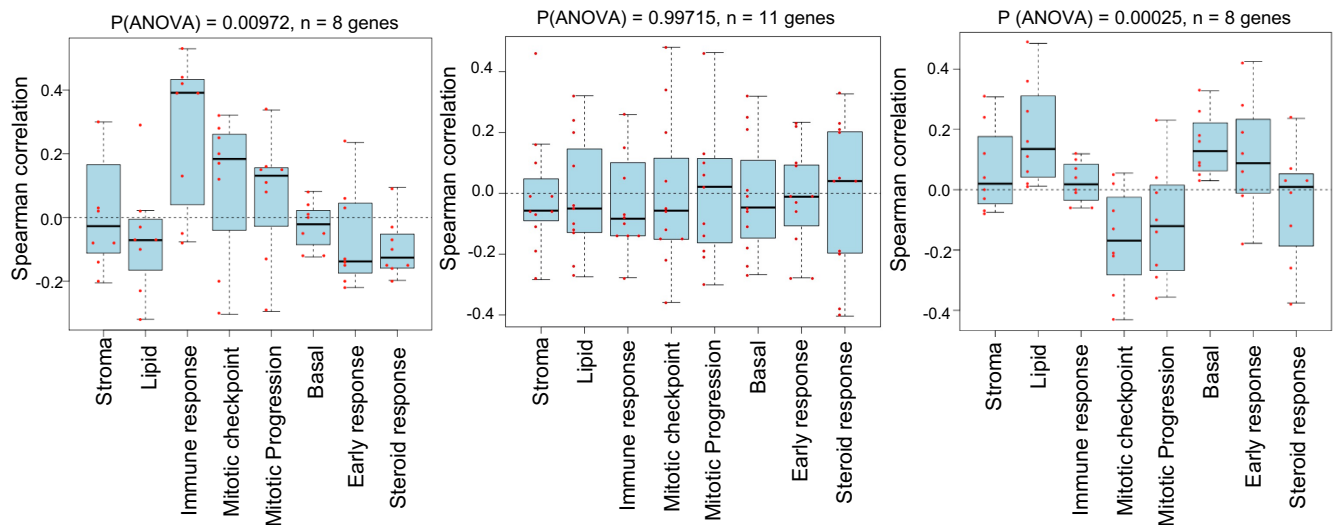

Supplementary Figure S11: Status of BCYW genes in intrinsic luminal A breast tumor subtype.

**a**, Overlap of up- and down-regulated genes in luminal A breast tumors from patients aged  $\leq 40$  years with upregulated or downregulated genes in normal breast tissues; **b**, Kaplan-Meier OS and RFS summaries of indicated 8 genes, 11 genes and 8 genes, respectively; **c**, Spearman correlation analysis of indicated 8 genes, 11 genes and 8 genes, respectively. All survival, correlation analysis performed using the online GOBO tools.

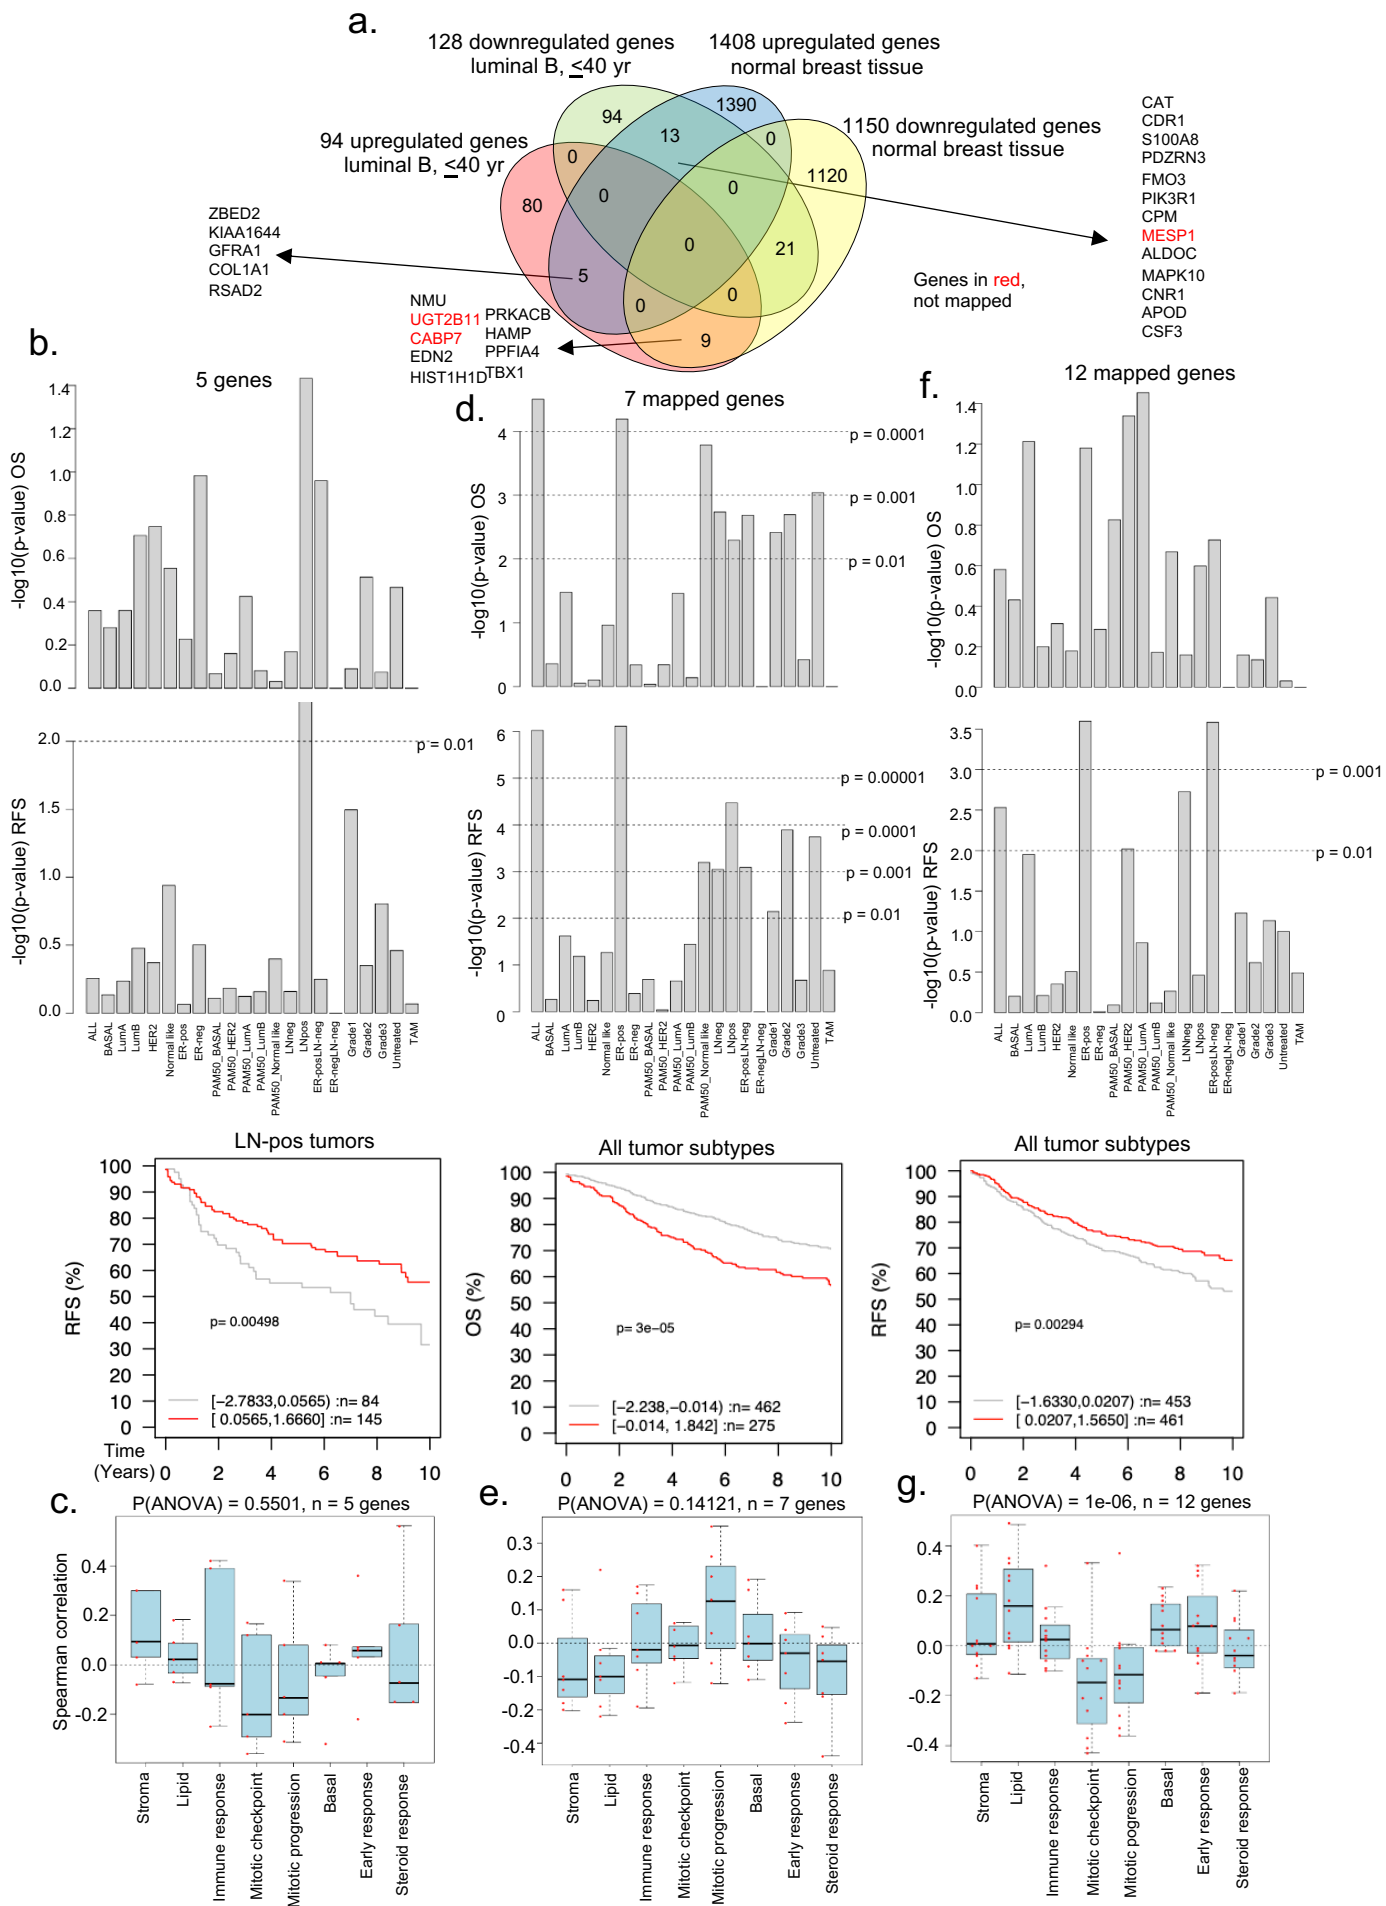

**Supplementary Figure S12: Status of BCYW genes in intrinsic luminal B breast tumor subtype.**

**a**, Overlap of up- and down-regulated genes in luminal B breast tumors from patients aged  $\leq 40$  year with upregulated or downregulated genes in normal breast tissues; **b**, Kaplan-Meier OS and RFS summaries of 5 genes, upregulated in luminal B breast tumors as well as in normal breast tissues; RFS curve using the high (red) and low (gray) expression of 5 genes in LN-pos breast tumors; **c**, Spearman correlation analysis of 5 genes in the context of co-expressed 8 gene modules; **d**, Kaplan-Meier OS and RFS summaries of 7 genes, upregulated in luminal B breast tumors but downregulated in normal breast tissues; OS curve using the high (red) and low (gray) expression of 7 genes in all tumor subtypes; **e**, Spearman correlation analysis of 7 genes in the context of co-expressed 8 gene modules; **f**, Kaplan-Meier OS and RFS summaries of 12 genes, downregulated in luminal B breast tumors but upregulated in normal breast tissues; RFS curve using the high (red) and low (gray) expression of 12 genes in all tumor subtypes; and **g**, Spearman correlation analysis of 12 genes in the context of co-expressed 8 gene modules. All survival, correlation analysis performed using the online GOBO tools.

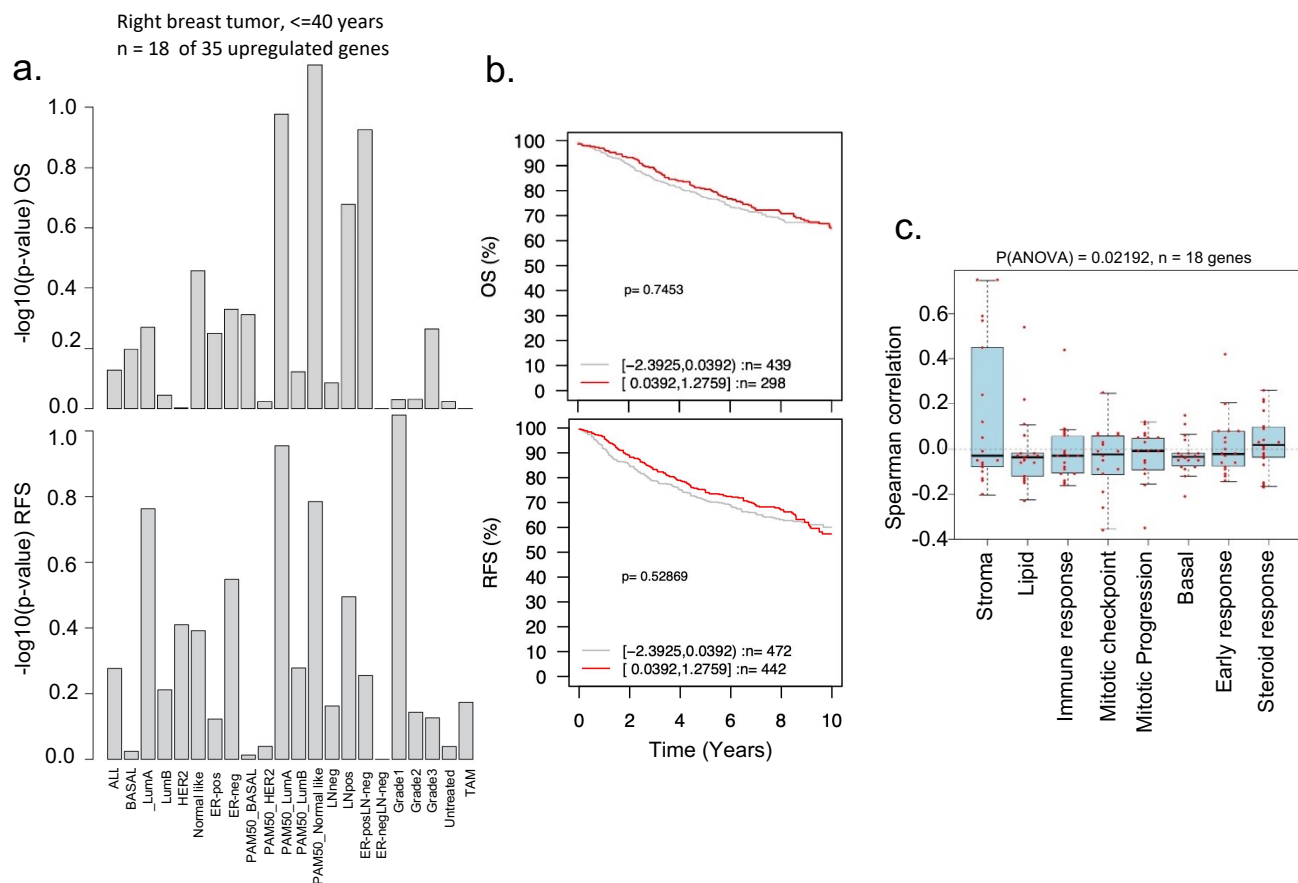

**Supplementary Figure S13:** Breast cancer genes in right breast tumors aged  $\leq 40$  years. **a**, Kaplan-Meier OS and RFS summaries of 18 of 35 upregulated genes in the right breast tumors from patients aged  $\leq 40$  years; **b**, OS and RFS curves using the high (red) and low (gray) expression of 18 genes in all breast tumor subtypes; and **c**, Spearman correlation analysis of 18 genes in the context of co-expressed 8 gene modules.



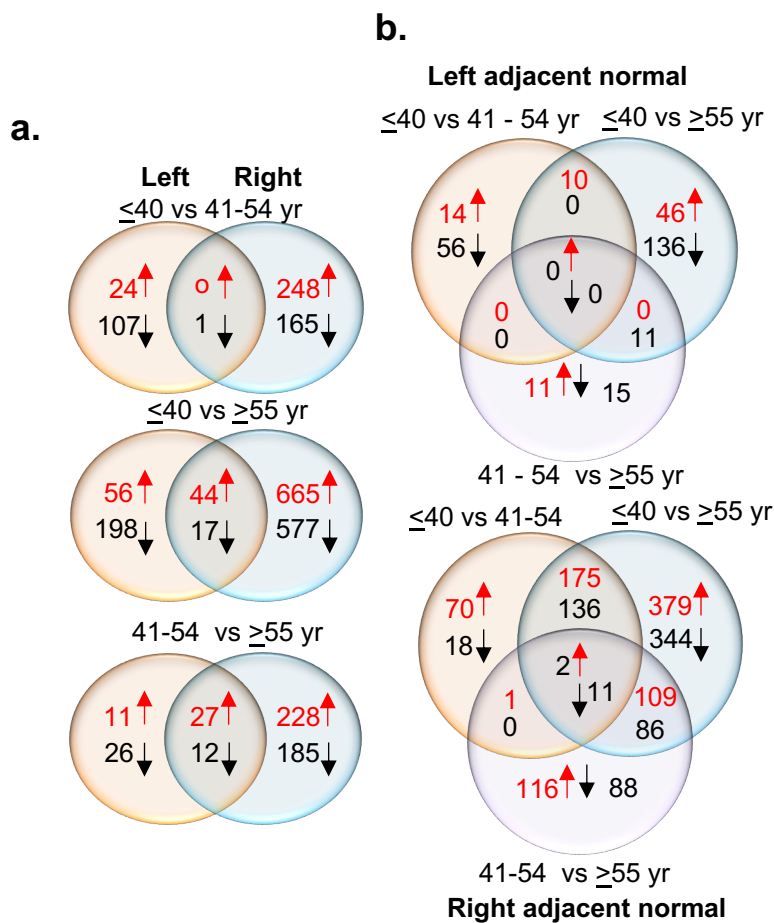

**Supplementary Figure S14:** Comparative analysis of dysregulated genes in matching normal specimens. **a**, Status of dysregulated DRG genes in the left and right adjacent normal tissues from three age groups; **b**, Overlap of dysregulated genes among  $\leq 40$  vs 41 - 54 years,  $\leq 40$  vs  $\geq 55$  years and 41 - 54 vs  $\geq 55$ -years age groups of adjacent matching normal breast tissue samples. Red, upregulated, and blue, downregulated genes.

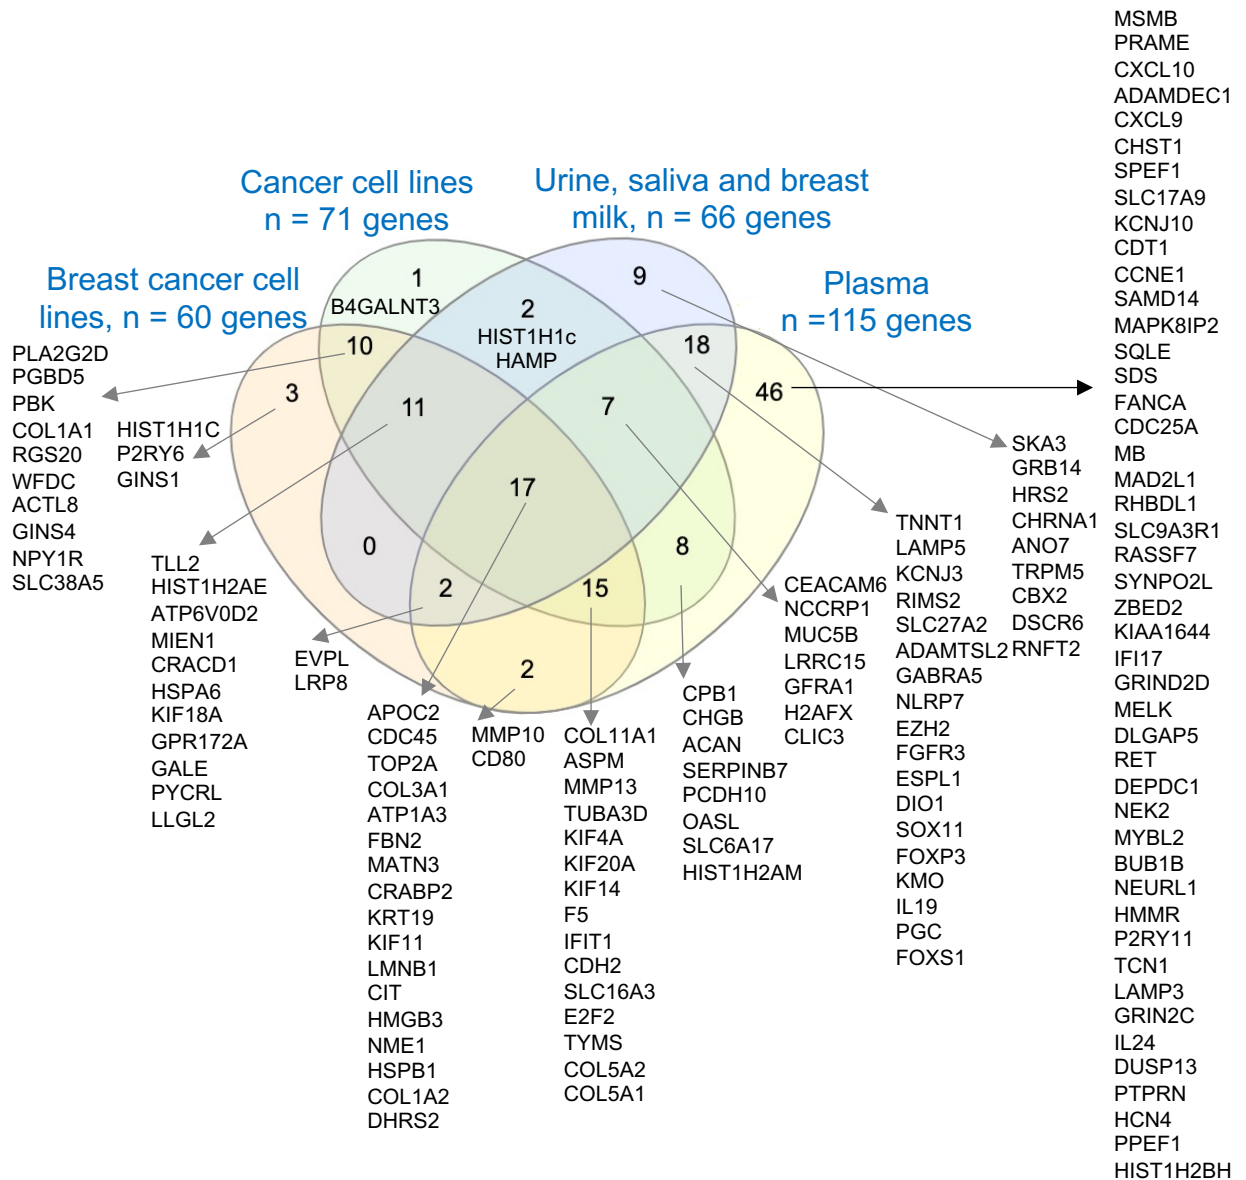

**Supplementary Figure S15:** Summary of exemplified comparative analyses to highlight the noticed overlap among secreted proteins by breast cancer cell lines, cancer cell lines, and three human body fluids such as urine, saliva and breast milk and plasma.

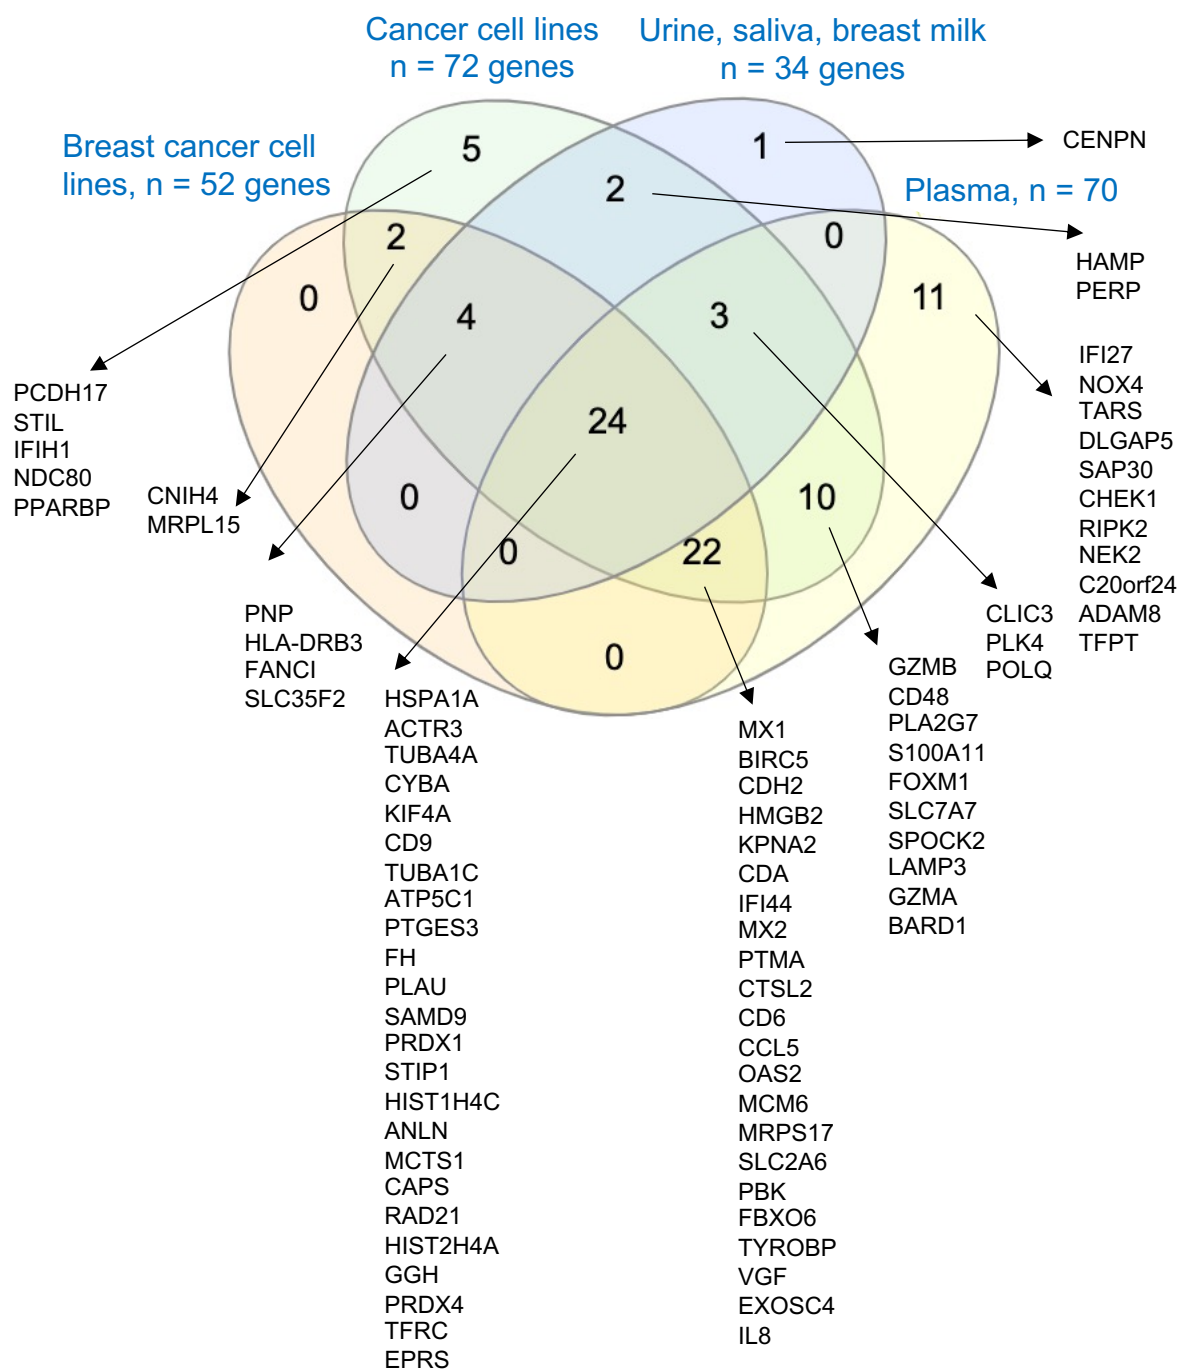

**Supplementary Fig. S16:** Summary and overlap of secreted proteins, identified in the METABRIC dataset for breast tumors aged  $\leq 40$  years, by breast cancer cell lines, cancer cell lines, human body fluids such as urine, saliva and breast milk, and plasma.

**Supplementary Table S1:** Summary of clinical features of the breast tumor specimens in the TCGA Firehose legacy breast cancer study.

| <b>Age Groups</b>                       | <b>≤40 yrs.</b> | <b>41-54 yrs.</b> | <b>≥55 yrs.</b> |
|-----------------------------------------|-----------------|-------------------|-----------------|
| <b>Sample Numbers</b>                   | 81              | 255               | 480             |
| <b>PAM50 Subtype Classifications</b>    |                 |                   |                 |
| Basal                                   | 16              | 53                | 70              |
| HER2                                    | 3               | 25                | 39              |
| LumA                                    | 42              | 108               | 267             |
| LumB                                    | 18              | 50                | 120             |
| <b>AJCC Stage</b>                       |                 |                   |                 |
| Stage I                                 | 25              | 13                | 40              |
| Stage IA                                | 6               | 20                | 38              |
| Stage IB                                | 1               | 2                 | 8               |
| Stage II                                | 20              | 18                | 18              |
| Stage IIA                               | 20              | 71                | 158             |
| Stage IIB                               | 18              | 60                | 79              |
| Stage III                               | 4               | 12                | 2               |
| Stage IIIA                              | 17              | 24                | 61              |
| Stage IIIB                              | 0               | 4                 | 19              |
| Stage IIIC                              | 3               | 9                 | 20              |
| Stage IV                                | 0               | 5                 | 10              |
| Stage X                                 | 2               | 2                 | 6               |
| <b>Anatomic Neoplasm Subdivision</b>    |                 |                   |                 |
| Right                                   | 9               | 52                | 93              |
| Left                                    | 17              | 52                | 100             |
| Right Upper                             | 22              | 59                | 128             |
| Right Lower                             | 4               | 15                | 46              |
| Left Upper                              | 16              | 87                | 141             |
| Left Lower                              | 3               | 20                | 32              |
| <b>Adjacent Matching Normal Samples</b> |                 |                   |                 |
|                                         | 12              | 37                | 59              |

**Supplementary Table S2:** Gene Ontology biological function analysis of 45 mapped genes out of 60 upregulated genes in Figure 1a.

|                                                                                         |                             |                                        |                     |                                                                                                                                                                                                                                                                                        |                               |                   |                                    |                                    |  |
|-----------------------------------------------------------------------------------------|-----------------------------|----------------------------------------|---------------------|----------------------------------------------------------------------------------------------------------------------------------------------------------------------------------------------------------------------------------------------------------------------------------------|-------------------------------|-------------------|------------------------------------|------------------------------------|--|
| Analysis: Biological process                                                            |                             |                                        |                     |                                                                                                                                                                                                                                                                                        |                               |                   |                                    |                                    |  |
| Dataset name: Group4                                                                    |                             |                                        |                     |                                                                                                                                                                                                                                                                                        |                               |                   |                                    |                                    |  |
| Number of genes in the dataset: 60                                                      |                             |                                        |                     |                                                                                                                                                                                                                                                                                        |                               |                   |                                    |                                    |  |
| Not recognized for the analysis : 15                                                    |                             |                                        |                     | IER5L;B4GALNT3;H2AFX;C18orf56;KLHL35;KIAA1644;C4orf48;HAR1A;MROH6;CABP7;HIST1H2BH;HIST1H2AE;HIST1H2AM;C6orf223;C1orf105                                                                                                                                                                |                               |                   |                                    |                                    |  |
| Number of genes in the dataset (which are available in Biological process database) :45 |                             |                                        |                     | COL5A2;COL5A1;COL1A2;TLL2;LLGL2;SLC6A17;FOXS1;SLC38A5;ANO7;CLIC3;CHRNA1;GABRA5;ADAMTSL2;KMO;HAMP;NLRP7;IL24;P2RY11;GRIN2C;TRPM5;HCN4;APOC2;PTPRN;PGBD5;PLA2G2D;LAMP3;F5;PPEF1;ZNF703;SLC27A2;RHBG;PGC;NPY1R;HSPB1;AMTN;DHRS2;ATP6V0D2;TCN1;CENPW;IL19;NME1;CHST8;MIEN1;DUSP13;C5orf46; |                               |                   |                                    |                                    |  |
| Number of genes in background: 17857                                                    |                             |                                        |                     |                                                                                                                                                                                                                                                                                        |                               |                   |                                    |                                    |  |
| Is analysis quantitative: No                                                            |                             |                                        |                     |                                                                                                                                                                                                                                                                                        |                               |                   |                                    |                                    |  |
| Corrected p-values                                                                      |                             |                                        |                     |                                                                                                                                                                                                                                                                                        |                               |                   |                                    |                                    |  |
|                                                                                         | No. of genes in the dataset | No. of genes in the background dataset | Percentage of genes | Fold enrichment                                                                                                                                                                                                                                                                        | P-value (Hypergeometric test) | Bonferroni method | Q-value (Storey-Tibshirani method) | genes mapped (from input data set) |  |
| Biological process                                                                      |                             |                                        |                     |                                                                                                                                                                                                                                                                                        |                               |                   |                                    |                                    |  |
| GO:1903225                                                                              | 2                           | 2                                      | 4.44                | 396.73                                                                                                                                                                                                                                                                                 | 0.00                          | 0.08              | 0.07                               | COL5A2; COL5A1;                    |  |
| collagen fibril organization                                                            | 4                           | 56                                     | 8.89                | 28.40                                                                                                                                                                                                                                                                                  | 0.00                          | 0.15              | 0.07                               | COL1A2; COL5A2; TLL2; COL5A1;      |  |
| eye morphogenesis                                                                       | 2                           | 4                                      | 4.44                | 198.86                                                                                                                                                                                                                                                                                 | 0.00                          | 0.46              | 0.15                               | COL5A2; COL5A1;                    |  |
| leucine transport                                                                       | 2                           | 5                                      | 4.44                | 159.17                                                                                                                                                                                                                                                                                 | 0.00                          | 0.77              | 0.19                               | LLGL2; SLC6A17;                    |  |
| blood vessel development                                                                | 3                           | 41                                     | 6.67                | 29.12                                                                                                                                                                                                                                                                                  | 0.00                          | 1.00              | 0.37                               | FOXS1; COL1A2; COL5A1;             |  |
| glycine transport                                                                       | 2                           | 9                                      | 4.44                | 88.51                                                                                                                                                                                                                                                                                  | 0.00                          | 1.00              | 0.46                               | SLC38A5; SLC6A17;                  |  |
| ion transmembrane transport                                                             | 4                           | 142                                    | 8.89                | 11.20                                                                                                                                                                                                                                                                                  | 0.00                          | 1.00              | 0.78                               | ANO7; CLIC3; CHRNA1; GABRA5;       |  |
| extracellular matrix organization                                                       | 4                           | 156                                    | 8.89                | 10.20                                                                                                                                                                                                                                                                                  | 0.00                          | 1.00              | 0.96                               | COL1A2; COL5A2; ADAMTSL2; COL5A1;  |  |
| cellular response to lipopolysaccharide                                                 | 4                           | 160                                    | 8.89                | 9.94                                                                                                                                                                                                                                                                                   | 0.00                          | 1.00              | 0.96                               | KMO; HAMP; NLRP7; IL24;            |  |
| calcium-mediated signaling                                                              | 3                           | 81                                     | 6.67                | 14.74                                                                                                                                                                                                                                                                                  | 0.00                          | 1.00              | 1.00                               | P2RY11; GRIN2C; TRPM5;             |  |

**Supplementary Table S3:** Gene Ontology biological function analysis of 14 mapped genes out of highly upregulated 17 genes in Figure 1e.

|                                                                                                                                                                   |                             |                                        |                     |                 |                               |                   |                            |                   |                                    |
|-------------------------------------------------------------------------------------------------------------------------------------------------------------------|-----------------------------|----------------------------------------|---------------------|-----------------|-------------------------------|-------------------|----------------------------|-------------------|------------------------------------|
| Analysis: Biological process                                                                                                                                      |                             |                                        |                     |                 |                               |                   |                            |                   |                                    |
| Dataset name: Group4                                                                                                                                              |                             |                                        |                     |                 |                               |                   |                            |                   |                                    |
| Number of genes in the dataset: 17                                                                                                                                |                             |                                        |                     |                 |                               |                   |                            |                   |                                    |
| Not recognized for the analysis : 4KLHL35;HAR1A;MROH6;C1ORF105                                                                                                    |                             |                                        |                     |                 |                               |                   |                            |                   |                                    |
| Number of genes in the dataset (which are available in Biological process database) :13PGBD5;LAMP3;KMO;ZNF703;F5;RHBG;LLGL2;GRIN2C;IL24;ATP6V0D2;IL19;MIEN1;NME1; |                             |                                        |                     |                 |                               |                   |                            |                   |                                    |
| Number of genes in background: 17857                                                                                                                              |                             |                                        |                     |                 |                               |                   |                            |                   |                                    |
| Is analysis quantitative: No                                                                                                                                      |                             |                                        |                     |                 |                               |                   |                            |                   |                                    |
| Corrected p-values                                                                                                                                                |                             |                                        |                     |                 |                               |                   |                            |                   |                                    |
|                                                                                                                                                                   | No. of genes in the dataset | No. of genes in the background dataset | Percentage of genes | Fold enrichment | P-value (Hypergeometric test) | Bonferroni method | Q-value (Storey-BH method) | Tibshirani method | genes mapped (from input data set) |
| Biological process                                                                                                                                                |                             |                                        |                     |                 |                               |                   |                            |                   |                                    |
| GO:0098038                                                                                                                                                        | 1                           | 1                                      | 7.69                | 1372.56         | 0.00                          | 1                 | 1                          | 1                 | PGBD5;                             |
| GO:1903900                                                                                                                                                        | 1                           | 1                                      | 7.69                | 1372.56         | 0.00                          | 1                 | 1                          | 1                 | LAMP3;                             |
| kynurenic acid biosynthetic process                                                                                                                               | 1                           | 2                                      | 7.69                | 689.69          | 0.00                          | 1                 | 1                          | 1                 | KMO;                               |
| GO:1903296                                                                                                                                                        | 1                           | 2                                      | 7.69                | 689.69          | 0.00                          | 1                 | 1                          | 1                 | KMO;                               |
| negative regulation of homotypic cell-cell adhesion                                                                                                               | 1                           | 2                                      | 7.69                | 689.69          | 0.00                          | 1                 | 1                          | 1                 | ZNF703;                            |
| quinolinate biosynthetic process                                                                                                                                  | 1                           | 3                                      | 7.69                | 460.56          | 0.00                          | 1                 | 1                          | 1                 | KMO;                               |
| anthranilate metabolic process                                                                                                                                    | 1                           | 3                                      | 7.69                | 460.56          | 0.00                          | 1                 | 1                          | 1                 | KMO;                               |
| L-kynurenine metabolic process                                                                                                                                    | 1                           | 3                                      | 7.69                | 460.56          | 0.00                          | 1                 | 1                          | 1                 | KMO;                               |
| response to vitamin K                                                                                                                                             | 1                           | 3                                      | 7.69                | 460.56          | 0.00                          | 1                 | 1                          | 1                 | F5;                                |
| transepithelial ammonium transport                                                                                                                                | 1                           | 3                                      | 7.69                | 460.56          | 0.00                          | 1                 | 1                          | 1                 | RHBG;                              |

**Supplementary Table S4:** Gene Ontology biological function analysis of 19 mapped genes out of 22 upregulated genes in Figures 2b and 2c.

|                                                                                                                          |                             |                                        |                      |                 |                               |                   |           |                                   |                                    |
|--------------------------------------------------------------------------------------------------------------------------|-----------------------------|----------------------------------------|----------------------|-----------------|-------------------------------|-------------------|-----------|-----------------------------------|------------------------------------|
| Analysis: Biological process                                                                                             |                             |                                        |                      |                 |                               |                   |           |                                   |                                    |
| Dataset name: Group1                                                                                                     |                             |                                        |                      |                 |                               |                   |           |                                   |                                    |
| Number of genes in the dataset: 22                                                                                       |                             |                                        |                      |                 |                               |                   |           |                                   |                                    |
| Not recognized for the analysis : 3                                                                                      |                             |                                        |                      |                 |                               |                   |           |                                   |                                    |
| NXPH1;MUC5B;C6orf223                                                                                                     |                             |                                        |                      |                 |                               |                   |           |                                   |                                    |
| FIBCD1;ACAN;PCDH10;CST9;SERPINB7;CPB1;HAMP;FOXS1;RIMS2;P2RY11;NCCRP1;DHRS2;CHGB;NPY1R;SLC6A17;LRRC15;TCN1;SYNPO2L;HS6ST3 |                             |                                        |                      |                 |                               |                   |           |                                   |                                    |
| Number of genes in the dataset (which are available in Biological process database) :19                                  |                             |                                        |                      |                 |                               |                   |           |                                   |                                    |
| Number of genes in background: 17857                                                                                     |                             |                                        |                      |                 |                               |                   |           |                                   |                                    |
| Is analysis quantitative: No                                                                                             |                             |                                        |                      |                 |                               |                   |           |                                   |                                    |
| Corrected p-values                                                                                                       |                             |                                        |                      |                 |                               |                   |           |                                   |                                    |
| Biological process                                                                                                       | No. of genes in the dataset | No. of genes in the background dataset | Percent age of genes | Fold enrichment | P-value (Hypergeometric test) | Bonferroni method | BH method | Q-value (Storey-Tibshiran method) | genes mapped (from input data set) |
| response to erythropoietin                                                                                               | 1                           | 1                                      | 5.26                 | 939.35          | 0.001064                      | 1.00              | 1.00      | 1.00                              | HAMP;                              |
| GO:1904479                                                                                                               | 1                           | 1                                      | 5.26                 | 939.35          | 0.001064                      | 1.00              | 1.00      | 1.00                              | HAMP;                              |
| positive regulation of platelet-derived growth factor production                                                         | 1                           | 2                                      | 5.26                 | 472.01          | 0.002127                      | 1.00              | 1.00      | 1.00                              | SERPINB7 ;                         |
| negative regulation of iron ion transmembrane transport                                                                  | 1                           | 2                                      | 5.26                 | 472.01          | 0.002127                      | 1.00              | 1.00      | 1.00                              | HAMP;                              |
| GO:1990641                                                                                                               | 1                           | 3                                      | 5.26                 | 315.20          | 0.003189                      | 1.00              | 1.00      | 1.00                              | HAMP;                              |
| positive regulation of glomerular mesangial cell proliferation                                                           | 1                           | 5                                      | 5.26                 | 189.37          | 0.005309                      | 1.00              | 1.00      | 1.00                              | SERPINB7 ;                         |
| positive regulation of cell growth involved in cardiac muscle cell development                                           | 1                           | 5                                      | 5.26                 | 189.37          | 0.005309                      | 1.00              | 1.00      | 1.00                              | HAMP;                              |
| leucine transport                                                                                                        | 1                           | 5                                      | 5.26                 | 189.37          | 0.005309                      | 1.00              | 1.00      | 1.00                              | SLC6A17;                           |
| GO:1903413                                                                                                               | 1                           | 5                                      | 5.26                 | 189.37          | 0.005309                      | 1.00              | 1.00      | 1.00                              | HAMP;                              |
| alanine transport                                                                                                        | 1                           | 5                                      | 5.26                 | 189.37          | 0.005309                      | 1.00              | 1.00      | 1.00                              | SLC6A17;                           |

**Supplementary Table S5:** Gene Ontology biological function analysis of 8 mapped genes out of 12 downregulated genes in Figure 2g.

|                                                                                           |                             |                                        |                     |                 |                                                           |                   |           |                                    |                                    |
|-------------------------------------------------------------------------------------------|-----------------------------|----------------------------------------|---------------------|-----------------|-----------------------------------------------------------|-------------------|-----------|------------------------------------|------------------------------------|
| Analysis: Biological process                                                              |                             |                                        |                     |                 |                                                           |                   |           |                                    |                                    |
| Dataset name: Group3                                                                      |                             |                                        |                     |                 |                                                           |                   |           |                                    |                                    |
| Number of genes in the dataset: 12                                                        |                             |                                        |                     |                 |                                                           |                   |           |                                    |                                    |
| Not recognized for the analysis : 4                                                       |                             |                                        |                     |                 | VAT1L;COLCA1;SPHKAP;EMILIN3                               |                   |           |                                    |                                    |
| Number of genes in the dataset (which are available in Biological process database) :8    |                             |                                        |                     |                 | TNFSF11;CSRNP3;PLPPR1;RSPO1;SLC26A3;SLCO1A2;SYCE1;IL22RA2 |                   |           |                                    |                                    |
| Number of genes in background: 17857                                                      |                             |                                        |                     |                 |                                                           |                   |           |                                    |                                    |
| Is analysis quantitative: No                                                              |                             |                                        |                     |                 |                                                           |                   |           |                                    |                                    |
| Corrected p-values                                                                        |                             |                                        |                     |                 |                                                           |                   |           |                                    |                                    |
|                                                                                           | No. of genes in the dataset | No. of genes in the background dataset | Percentage of genes | Fold enrichment | P-value (Hypergeometric test)                             | Bonferroni method | BH method | Q-value (Storey-Tibshirani method) | genes mapped (from input data set) |
| Biological process                                                                        |                             |                                        |                     |                 |                                                           |                   |           |                                    |                                    |
| positive regulation of corticotropin-releasing hormone secretion                          | 1                           | 1                                      | 12.5                | 2229.34         | 0.000448                                                  | 1                 | 1         | 1                                  | TNFSF11;                           |
| GO:1904616                                                                                | 1                           | 1                                      | 12.5                | 2229.34         | 0.000448                                                  | 1                 | 1         | 1                                  | TNFSF11;                           |
| positive regulation of fever generation by positive regulation of prostaglandin secretion | 1                           | 2                                      | 12.5                | 1120.215        | 0.000896                                                  | 1                 | 1         | 1                                  | TNFSF11;                           |
| positive regulation of ERK1 and ERK2 cascade via TNFSF11-mediated signaling               | 1                           | 2                                      | 12.5                | 1120.215        | 0.000896                                                  | 1                 | 1         | 1                                  | TNFSF11;                           |
| cytokine-mediated signaling pathway                                                       | 2                           | 145                                    | 25                  | 30.90113        | 0.001776                                                  | 1                 | 1         | 1                                  | TNFSF11; IL22RA2;                  |
| osteoclast proliferation                                                                  | 1                           | 4                                      | 12.5                | 561.5045        | 0.001791                                                  | 1                 | 1         | 1                                  | TNFSF11;                           |
| positive regulation of osteoclast development                                             | 1                           | 4                                      | 12.5                | 561.5045        | 0.001791                                                  | 1                 | 1         | 1                                  | TNFSF11;                           |
| intracellular pH elevation                                                                | 1                           | 4                                      | 12.5                | 561.5045        | 0.001791                                                  | 1                 | 1         | 1                                  | SLC26A3;                           |
| positive regulation of homotypic cell-cell adhesion                                       | 1                           | 5                                      | 12.5                | 449.4277        | 0.002238                                                  | 1                 | 1         | 1                                  | TNFSF11;                           |
| TNFSF11-mediated signaling pathway                                                        | 1                           | 5                                      | 12.5                | 449.4277        | 0.002238                                                  | 1                 | 1         | 1                                  | TNFSF11;                           |



**Supplementary Table S6:** Gene Ontology biological function analysis of 26 mapped genes out of 27 upregulated genes in Figure 3b.

|                                                                                                                                                                                                                                                     |                             |                                        |                        |                  |                                 |                     |            |                                    |                                    |
|-----------------------------------------------------------------------------------------------------------------------------------------------------------------------------------------------------------------------------------------------------|-----------------------------|----------------------------------------|------------------------|------------------|---------------------------------|---------------------|------------|------------------------------------|------------------------------------|
| Analysis: Biological process                                                                                                                                                                                                                        |                             |                                        |                        |                  |                                 |                     |            |                                    |                                    |
| Dataset name: Group2                                                                                                                                                                                                                                |                             |                                        |                        |                  |                                 |                     |            |                                    |                                    |
| Number of genes in the dataset: 27                                                                                                                                                                                                                  |                             |                                        |                        |                  |                                 |                     |            |                                    |                                    |
| Not recognized for the analysis: 1 HMMR                                                                                                                                                                                                             |                             |                                        |                        |                  |                                 |                     |            |                                    |                                    |
| Number of genes in the dataset SGO1;DLGAP5;NEK2;TOP2A;SKA3;TUBA3D;PBK;MYBL2;ESPL1;KIF4A;KIF20A;BUB1B;KIF (which are available in Biological 14;MELK;RET;TNNT1;ASPM;CDC45;KCNJ3;COL11A1;CRACD;NEURL1;MMP13;LAMP5;S process database) :26 YT13;DEPDC1 |                             |                                        |                        |                  |                                 |                     |            |                                    |                                    |
| Number of genes in background: 17857                                                                                                                                                                                                                |                             |                                        |                        |                  |                                 |                     |            |                                    |                                    |
| Is analysis quantitative: No                                                                                                                                                                                                                        |                             |                                        |                        |                  |                                 |                     |            |                                    |                                    |
| Corrected p-values                                                                                                                                                                                                                                  |                             |                                        |                        |                  |                                 |                     |            |                                    |                                    |
|                                                                                                                                                                                                                                                     | No. of genes in the dataset | No. of genes in the background dataset | Perc enta ge of gene s | Fold enrich ment | P-value (Hyper geome tric test) | Bonfer roni metho d | BH metho d | Q-value (Storey-Tibshirani method) | genes mapped (from input data set) |
| Biological process                                                                                                                                                                                                                                  |                             |                                        |                        |                  |                                 |                     |            |                                    |                                    |
| chromosome segregation                                                                                                                                                                                                                              | 5                           | 73                                     | 19.2 3                 | 47.11            | 0.00                            | 0.00                | 0.00       | 0.01                               | SGO1; DLGAP5; NEK2; TOP2A; SKA3;   |
| mitotic cell cycle                                                                                                                                                                                                                                  | 5                           | 132                                    | 19.2 3                 | 26.06            | 0.00                            | 0.01                | 0.01       | 0.05                               | TUBA3D; PBK; NEK2; MYBL2; SKA3;    |
| mitotic sister chromatid segregation                                                                                                                                                                                                                | 3                           | 33                                     | 11.5 4                 | 62.60            | 0.00                            | 0.18                | 0.06       | 0.41                               | SGO1; NEK2; ESPL1;                 |
| cytokinesis after mitosis                                                                                                                                                                                                                           | 3                           | 50                                     | 11.5 4                 | 41.32            | 0.00                            | 0.64                | 0.14       | 0.96                               | KIF4A; KIF20A; ESPL1;              |
| homologous chromosome segregation                                                                                                                                                                                                                   | 2                           | 8                                      | 7.69                   | 172.28           | 0.00                            | 0.70                | 0.14       | 0.96                               | SGO1; ESPL1;                       |
| cell division                                                                                                                                                                                                                                       | 5                           | 348                                    | 19.2 3                 | 9.88             | 0.00                            | 1.00                | 0.24       | 1.00                               | SGO1; NEK2; BUB1B; KIF14; SKA3;    |
| positive regulation of mitotic metaphase/anaphase transition                                                                                                                                                                                        | 2                           | 12                                     | 7.69                   | 114.90           | 0.00                            | 1.00                | 0.24       | 1.00                               | DLGAP5; ESPL1;                     |
| peptidyl-tyrosine phosphorylation                                                                                                                                                                                                                   | 3                           | 130                                    | 11.5 4                 | 15.89            | 0.00                            | 1.00                | 1.00       | 1.00                               | MELK; RET; PBK;                    |
| GO:1905463                                                                                                                                                                                                                                          | 1                           | 1                                      | 3.85                   | 686.54           | 0.00                            | 1.00                | 1.00       | 1.00                               | TOP2A;                             |
| negative regulation of muscle contraction                                                                                                                                                                                                           | 1                           | 1                                      | 3.85                   | 686.54           | 0.00                            | 1.00                | 1.00       | 1.00                               | TNNT1;                             |

**Supplementary Table S7:** Gene Ontology biological function analysis of 95 mapped genes out of 124 upregulated genes in Figure 7b (left breast cancer).

Analysis: Biological process

Dataset name: Left&lt;40 124Genes

Not recognized for the analysis : 124

Number of genes in the dataset: 29 TRY6;LOC400696;C2orf54;CNTD2;LINGO1;FAM64A;RDM1;C19orf33;RLTPR;DSCR6;NCRNA00176;C15orf42;MLF1IP;HIST1H2BE;C9orf140;NFKBIL2;ORC1L;KIAA1524;KIAA1211;C16orf75;PRR19;C3orf67;C20orf151;C18orf56;FCGR1C;GPR172A;PYCRL;C14orf80;RAG1AP1

|                                                                                         |                                                                                                                                                                                                                                                                                                                                                                                                                                                                                                                                                                                                             |
|-----------------------------------------------------------------------------------------|-------------------------------------------------------------------------------------------------------------------------------------------------------------------------------------------------------------------------------------------------------------------------------------------------------------------------------------------------------------------------------------------------------------------------------------------------------------------------------------------------------------------------------------------------------------------------------------------------------------|
| Number of genes in the dataset (which are available in Biological process database) :95 | IL4I1;FCGR1A;SRMS;IRF7;HMGB3;ADAMDEC1;HAMP;CD80;ESPL1;SAMD14;EZH2;CXCL10;LLGL2;RCC1;TMEM145;CXCL9;RAMP1;ADORA2A;P2RY6;HSPB1;TLX1;ZNF695;E2F2;FOXP3;FOXS1;SIX4;EVPL;PRAME;CEACAM6;SOX11;FGFR3;TNFRSF18;NUAK2;MAD2L1;SAMD11;CXCL11;MMP10;FAM111B;LRP8;RHBDL1;CDH2;CCNE1;MAPK8IP2;CRABP2;SLC9A3R1;TYMS;HSH2D;METRN;RASSF7;CAPS;CIT;JAKMIP1;KIF18A;POC1A;RNFT2;FBXO43;CBX2;CDC25A;MFSD2B;NME1;VSTM2L;MSMB;CHST1;SDS;LGALS9C;MND1;CDCA2;CDT1;KIF11;MATN3;MB;RAD51AP1;PIF1;SBK1;SPEF1;APOC2;SQLE;FANCA;PRR11;KCNJ10;PPM1J;ATP1A3;SLC17A9;KRT19;FBN2;ACTL8;IL21R;DIO1;LMNB1;GINS1;GINS4;IL17REL;SLC16A3;AIFM3;GALE |
|-----------------------------------------------------------------------------------------|-------------------------------------------------------------------------------------------------------------------------------------------------------------------------------------------------------------------------------------------------------------------------------------------------------------------------------------------------------------------------------------------------------------------------------------------------------------------------------------------------------------------------------------------------------------------------------------------------------------|

Number of genes in background: 17857

Is analysis quantitative: No

Corrected p-values

| Biological process                                                        | No. of genes in the dataset | No. of genes in the background dataset | Percent age of genes | Fold enrichment | P-value (Hypergeometric test) | Selected p-values |           |                                    |                                                         |
|---------------------------------------------------------------------------|-----------------------------|----------------------------------------|----------------------|-----------------|-------------------------------|-------------------|-----------|------------------------------------|---------------------------------------------------------|
|                                                                           |                             |                                        |                      |                 |                               | Bonferroni method | BH method | Q-value (Storey-Tibshirani method) | genes mapped (from input data set)                      |
| regulation of mitosis                                                     | 3                           | 23                                     | 3.16                 | 24.59           | 0.000239                      | 1.00              | 1.00      | 1.00                               | CDCA2; FBXO43; RCC1;                                    |
| GO:1903934                                                                | 2                           | 5                                      | 2.11                 | 75.40           | 0.000277                      | 1.00              | 1.00      | 1.00                               | GIN51; GINS4;                                           |
| adenylate cyclase-activating G-protein coupled receptor signaling pathway | 5                           | 121                                    | 5.26                 | 7.78            | 0.000468                      | 1.00              | 1.00      | 1.00                               | CXCL11; CXCL10; CXCL9; RAMP1; ADORA2A;                  |
| positive regulation of release of sequestered calcium ion into cytosol    | 3                           | 29                                     | 3.16                 | 19.50           | 0.000482                      | 1.00              | 1.00      | 1.00                               | CXCL11; CXCL10; CXCL9;                                  |
| GO:0097421                                                                | 3                           | 29                                     | 3.16                 | 19.50           | 0.000482                      | 1.00              | 1.00      | 1.00                               | HAMP; EZH2; TYMS;                                       |
| cell division                                                             | 8                           | 348                                    | 8.42                 | 4.33            | 0.000535                      | 1.00              | 1.00      | 1.00                               | CDCA2; CDT1; CCNE1; KIF11; CDC25A; MAD2L1; LLGL2; RCC1; |
| positive regulation of phospholipase activity                             | 2                           | 7                                      | 2.11                 | 53.89           | 0.000578                      | 1.00              | 1.00      | 1.00                               | FGFR3; APOC2;                                           |
| mitotic sister chromatid segregation                                      | 3                           | 33                                     | 3.16                 | 17.14           | 0.000709                      | 1.00              | 1.00      | 1.00                               | ESPL1; KIF18A; MAD2L1;                                  |
| neuroepithelial cell differentiation                                      | 2                           | 8                                      | 2.11                 | 47.16           | 0.000768                      | 1.00              | 1.00      | 1.00                               | SOX11; CDH2;                                            |
| negative regulation of retinoic acid receptor signaling pathway           | 2                           | 9                                      | 2.11                 | 41.93           | 0.000984                      | 1.00              | 1.00      | 1.00                               | PRAME; EZH2;                                            |

**Supplementary Table S8:** Gene Ontology biological function analysis of 11 highly upregulated genes in Figure 7f.

|                                                                                         |                             |                                        |                     |                 |                               |                   |           |                                    |                                   |
|-----------------------------------------------------------------------------------------|-----------------------------|----------------------------------------|---------------------|-----------------|-------------------------------|-------------------|-----------|------------------------------------|-----------------------------------|
| Analysis: Biological process                                                            |                             |                                        |                     |                 |                               |                   |           |                                    |                                   |
| Number of genes in the dataset: 11                                                      |                             |                                        |                     |                 |                               |                   |           |                                    |                                   |
| Number of genes in the dataset (which are available in Biological process database) :11 |                             |                                        |                     |                 |                               |                   |           |                                    |                                   |
| SLC50A1;KCNJ10;FCGR1A;CRABP2;SLC52A2;PYCR3;FBXO43;SQLE;TONSL;NUAK2;ZNF695               |                             |                                        |                     |                 |                               |                   |           |                                    |                                   |
| Number of genes in background: 17857                                                    |                             |                                        |                     |                 |                               |                   |           |                                    |                                   |
| Is analysis quantitative: No                                                            |                             |                                        |                     |                 |                               |                   |           |                                    |                                   |
| Corrected p-values                                                                      |                             |                                        |                     |                 |                               |                   |           |                                    |                                   |
|                                                                                         | No. of genes in the dataset | No. of genes in the background dataset | Percentage of genes | Fold enrichment | P-value (Hypergeometric test) | Bonferroni method | BH method | Q-value (Storey-Tibshirani method) | genes mapped (from input dataset) |
| Biological process                                                                      |                             |                                        |                     |                 |                               |                   |           |                                    |                                   |
| cellular aromatic compound metabolic process                                            | 1                           | 1                                      | 9.09                | 1621.89         | 0.000616                      | 1.00              | 1.00      | 1.00                               | SQLE;                             |
| glucoside transport                                                                     | 1                           | 1                                      | 9.09                | 1621.89         | 0.000616                      | 1.00              | 1.00      | 1.00                               | SLC50A1;                          |
| glutamate uptake involved in synaptic transmission                                      | 1                           | 2                                      | 9.09                | 814.98          | 0.001232                      | 1.00              | 1.00      | 1.00                               | KCNJ10;                           |
| antibody-dependent cellular cytotoxicity                                                | 1                           | 3                                      | 9.09                | 544.22          | 0.001847                      | 1.00              | 1.00      | 1.00                               | FCGR1A;                           |
| retinoic acid biosynthetic process                                                      | 1                           | 5                                      | 9.09                | 326.97          | 0.003077                      | 1.00              | 1.00      | 1.00                               | CRABP2;                           |
| riboflavin metabolic process                                                            | 1                           | 5                                      | 9.09                | 326.97          | 0.003077                      | 1.00              | 1.00      | 1.00                               | SLC52A2;                          |
| L-proline biosynthetic process                                                          | 1                           | 6                                      | 9.09                | 272.56          | 0.003691                      | 1.00              | 1.00      | 1.00                               | PYCR3;                            |
| negative regulation of meiosis                                                          | 1                           | 6                                      | 9.09                | 272.56          | 0.003691                      | 1.00              | 1.00      | 1.00                               | FBXO43;                           |
| riboflavin transport                                                                    | 1                           | 6                                      | 9.09                | 272.56          | 0.003691                      | 1.00              | 1.00      | 1.00                               | SLC52A2;                          |
| positive regulation of collateral sprouting                                             | 1                           | 8                                      | 9.09                | 204.51          | 0.004918                      | 1.00              | 1.00      | 1.00                               | CRABP2;                           |

**Supplementary Table S9: Examples of secreted gene products relevant to the biology of BCYW, aged  $\leq 40$  years.**

**A. Upregulated genes in BC  $\leq 40$  years, Fig. 1a**

|                     |                                                                                                                                                                                                                      |
|---------------------|----------------------------------------------------------------------------------------------------------------------------------------------------------------------------------------------------------------------|
| Breast cancer cells | LLGL2, F5, NME1, COL1A2, HSPB1, COL5A2, PGBD5, TLL2, COL5A1, NPY1R, PLA2G2D, HIST1H2AE, DHRS2, SLC38A5, ATP6V0D2, APOC2                                                                                              |
| Cancer cell lines   | LLGL2, F5, NME1, COL1A2, HSPB1, COL5A2, PGBD5, TLL2, COL5A1, NPY1R, PLA2G2D, HIST1H2AE, DHRS2, H2AFX, HAMP, CLIC3, HIST1H2AM, SLC38A5, ATP6V0D2, APOC2, B4GALNT3, SLC6A17                                            |
| Urine               | LLGL2, NME1, COL1A2, HSPB1, H2AFX, KMO, SLC27A2, ADAMTSL2, HAMP, CLIC3, CHRNA1, HIST1H2AE, PGC, DHRS2, GABRA5, ANO7, FOXS1, ATP6V0D2, NLRP7                                                                          |
| Saliva              | NME1, HSPB1, HIST1H2AE                                                                                                                                                                                               |
| Breast milk         | LLGL2, NME1, HSPB1, TLL2, HAMP, IL19                                                                                                                                                                                 |
| Proteome            | LAMP3, F5, NME1, COL1A2, HSPB1, H2AFX, COL5A2, KMO, SLC27A2, ADAMTSL2, P2RY11, COL5A1, PTPRN, CLIC3, GRIN2C, IL24, HCN4, PPEF1, TCN1, DUSP13, PGC, HIST1H2AM, DHRS2, GABRA5, FOXS1, SLC6A17, APOC2, NLRP7, HIST1H2BH |

**B. Subset of highly upregulated genes in BC  $\leq 40$  years, Fig. 1e**

|                     |                                          |
|---------------------|------------------------------------------|
| Breast cancer cells | MIEN1, LLGL2, F5, NME1, PGBD5, ATP6V0D2  |
| Cancer cell lines   | MIEN1, LLGL2, F5, NME1, PGBD5, ATP6V0D2  |
| Urine               | MIEN1, LLGL2, NME1, KMO, ATP6V0D2        |
| Saliva              | NME1                                     |
| Breast milk         | IL19, MIEN1, NME1, LLGL2                 |
| Proteome            | LAMP3, F5, NME1, KMO, GRIN2C, IL24, IL19 |

**C. Upregulated genes in BC but downregulated in adjacent normal, Fig. 2b,c**

|                     |                                                                                                                |
|---------------------|----------------------------------------------------------------------------------------------------------------|
| Breast cancer cells | DHRS2, NCCRP1, CHGB, NPY1R, ACAN, MUC5B, LRRC15                                                                |
| Cancer cell lines   | DHRS2, SLC6A17, CPB1, NCCRP1, CHGB, NPY1R, ACAN, SERPINB7, HAMP, MUC5B, LRRC15, PCDH10                         |
| Urine               | HRS2, NCCRP1, RIMS2, HAMP, FOXS1, MUC5B, LRRC15                                                                |
| Saliva              | NCCRP1, MUC5B                                                                                                  |
| Breast milk         | NCCRP1, MUC5B, HAMP                                                                                            |
| Proteome            | DHRS2, TCN1, SLC6A17, CPB1, NCCRP1, RIMS2, CHGB, SYNPO2L, ACAN, SERPINB7, FOXS1, MUC5B, LRRC15, P2RY11, PCDH10 |

**D. Upregulated genes in BC 3-age groups and adjacent normal DRG  $\leq 40$ vs $>55$  years, Fig. 3a**

|                     |                                                                                                                                                           |
|---------------------|-----------------------------------------------------------------------------------------------------------------------------------------------------------|
| Breast cancer cells | COL11A1, ASPM, MMP13, CDC45, TUBA3D, PBK, CRACD1, KIF4A, KIF20A, TOP2A, KIF14                                                                             |
| Cancer cell lines   | COL11A1, ASPM, MMP13, CDC45, TUBA3D, PBK, CRACD1, KIF4A, KIF20A, TOP2A, KIF14, CDC45, TUBA3D                                                              |
| Urine               | TNNT1, LAMP5, CDC45, CRACD1, TOP2A, KCNJ3, SKA3                                                                                                           |
| Proteome            | TNNT1, COL11A1, LAMP5, ASPM, MMP13, MELK, DLGAP5, RET, CDC45, TUBA3D, DEPDC1, KIF4A, NEK2, MYBL2, KIF20A, BUB1B, NEURL1, TOP2A, HMMR, KCNJ3, KIF14, ESPL1 |

**E. Upregulated genes in BC  $\leq 40$  year and normal breast tissues, Fig. 4a**

|                     |                               |
|---------------------|-------------------------------|
| Breast cancer cells | COL1A2, COL5A2, COL5A1, NPY1R |
| Cancer cell lines   | COL1A2, COL5A2, COL5A1, NPY1R |
| Urine               | COL1A2                        |
| Proteome            | COL1A2, COL5A2, COL5A1        |

**F. Upregulated genes in BC  $\leq 40$  year but downregulated in normal breast tissues, Fig. 4b**

|                     |                                     |
|---------------------|-------------------------------------|
| Breast cancer cells | F5, SLC38A5, DHRS2                  |
| Cancer cell lines   | F5, SLC38A5, DHRS2, HAMP            |
| Urine               | HAMP, PGC, DHRS2                    |
| Breast milk         | HAMP                                |
| Proteome            | LAMP3, F5, TCN1, DUSP13, PGC, DHRS2 |

| G. Upregulated genes in basal BC ≤40 years and in normal breast tissues, Fig. 6c                           |                                                                                                                                                                                                                                                                    |  |
|------------------------------------------------------------------------------------------------------------|--------------------------------------------------------------------------------------------------------------------------------------------------------------------------------------------------------------------------------------------------------------------|--|
| Breast cancer cells                                                                                        | HSPA6, RGS20, WFDC, HIST1H1c                                                                                                                                                                                                                                       |  |
| Cancer cell lines                                                                                          | HSPA6, RGS20, WFDC, HIST1H1C, GRB14                                                                                                                                                                                                                                |  |
| Urine                                                                                                      | HSPA6, GRB14, HIST1H1C                                                                                                                                                                                                                                             |  |
| Saliva                                                                                                     | HSPA6                                                                                                                                                                                                                                                              |  |
| Breast milk                                                                                                | HIST1H1c                                                                                                                                                                                                                                                           |  |
| H. Upregulated genes in LumA and LumB BC ≤40 years and normal breast tissues, Supplementary Fig. 10 and 11 |                                                                                                                                                                                                                                                                    |  |
| Breast cancer cells                                                                                        | COL1A1, COL3A1, IFIT1                                                                                                                                                                                                                                              |  |
| Cancer cell lines                                                                                          | GFRA1, COL1A1, OASL, COL3A1, IFIT1                                                                                                                                                                                                                                 |  |
| Urine                                                                                                      | GFRA1, COL1A1,                                                                                                                                                                                                                                                     |  |
| Saliva                                                                                                     | COL3A1                                                                                                                                                                                                                                                             |  |
| Proteome                                                                                                   | ZBED2, KIAA1644, GFRA1, IFI17, OASL, COL3A1, IFIT1GRIND2D, ZBED2                                                                                                                                                                                                   |  |
| I. Downregulated in HER2 BC ≤40 years and upregulated in normal breast tissues, Supplementary Fig. 9a      |                                                                                                                                                                                                                                                                    |  |
| Breast cancer cells                                                                                        | TTN, GAS6, GAS7, SGCB, SPTBN1, KCTD12, FABP5, PVRL3, ARHGEF6, PIK3R1, DPP4, CD1C, F13A1, STXBP6, APOD                                                                                                                                                              |  |
| Cancer cell lines                                                                                          | TTN, COLEC12, GAS6, PKD2, GAS7, NEDD9, SGCB, FGFR1, HOXA10, TACC1, SPTBN1, PPP1R16B, KCTD12, FABP5, PVRL3, ARHGEF6, PIK3R1, DPP4, CD1C, KCNK3, F13A1, STXBP6, APOD, GFRA1                                                                                          |  |
| Urine                                                                                                      | TTN, COLEC12, GAS6, PKD2, GAS7, NEDD9, SGCB, FGFR1, HOXA10, TACC1, SPTBN1, PPP1R16B, KCTD12, FABP5, PVRL3, ARHGEF6, PIK3R1, DPP4, CD1C, KCNK3, F13A1, STXBP6, APOD, GFRA1                                                                                          |  |
| Saliva                                                                                                     | FGFR1, DPP4                                                                                                                                                                                                                                                        |  |
| Breast milk                                                                                                | FGFR1, SPTBN1, FABP5, APOD                                                                                                                                                                                                                                         |  |
| Proteome                                                                                                   | TTN, CCNT1, KLF9, BTG2, TEF, COLEC12, GAS6, PLCL2, PKD2, GAS7, NEDD9, SGCB, FGFR1, ZNF423, TEAD1, HOXA10, DIO3, TACC1, SPTBN1, ADRBK2, PPP1R16B, KCTD12, FABP5, PVRL3, ARHGEF6, CYP7B1, PIK3R1, DPP4, GLRB, IRAK3, KCNK3, F13A1, CYP4F12, NAV3, HOXA9, APOD, GFRA1 |  |
| J. Upregulated genes in left BC ≤40 years, Fig. 7b left                                                    |                                                                                                                                                                                                                                                                    |  |
| Breast cancer cells                                                                                        | ACTL8, CEACAM6, ATP1A3, FBN2, MATN3, CDH2, CRABP2, SLC16A3, E2F2, KRT19, KIF18A, KIF11, LMNB1, HSPB1, CIT, GINS4, LLGL2, HMGB3, GPR172A, GALE, PYCRL, TYMS, NME1                                                                                                   |  |
| Cancer cell lines                                                                                          | ACTL8, MMP10, ATP1A3, FBN2, MATN3, CDH2, CRABP2, CD80, SLC16A3, E2F2, KRT19, KIF18A, KIF11, LMNB1, P2RY6, EVPL, HSPB1, GINS1, LRP8, CIT, GINS4, LLGL2, HMGB3, GPR172A, GALE, PYCRL, TYMS, NME1                                                                     |  |
| Urine                                                                                                      | CBX2, FGFR3, ESPL1, DSCR6, CRABP2, KRT19, KIF18A, KIF11, RNFT2, LMNB1, EVPL, HSPB1, EZH2, CIT, LLGL2, HMGB3, GALE, NME1, CEACAM6, DIO1, SOX11, ATP1A3, FBN2, MATN3                                                                                                 |  |
| Saliva                                                                                                     | CEACAM6, KRT19, EVPL, NME1                                                                                                                                                                                                                                         |  |
| Breast milk                                                                                                | MATN3, CRABP2, KRT19, EVPL, HSPB1, LLGL2, GPR172A, GALE, PYCRL, NME1                                                                                                                                                                                               |  |
| Proteome                                                                                                   | TTN, CCNT1, KLF9, BTG2, TEF, COLEC12, GAS6, PLCL2, PKD2, GAS7, NEDD9, SGCB, FGFR1, ZNF423, TEAD1, HOXA10, DIO3, TACC1, SPTBN1, ADRBK2, PPP1R16B, KCTD12, FABP5, PVRL3, ARHGEF6, CYP7B1, PIK3R1, DPP4, GLRB, IRAK3, KCNK3, F13A1, CYP4F12, NAV3, HOXA9, APOD, GFRA1 |  |

**Supplementary Table S10:** Summary of key observations in the present study. Empty blocks in OS and RFS, no significant p-value; ND, not determined; NS, not significant; pos, positive correlation; Neg, negative correlation.

|                                 | Upregulated<br>genes<br>BC≤40 yr | Highly<br>Upregulated<br>≤40 yr | Up BC ≤40 years<br>Down in adjacent<br>normal | Up BC<br>Up adjacent normal<br>≤40 vs ≥55 yr | Up BC ≤40 yr<br>common<br>Up normal breast | Up BC ≤40 yr<br>common<br>Down normal breast | Down BC <40 yr<br>common<br>Up normal breast | Up basal ≤40 yr<br>common<br>Up normal breast | Down basal ≤40 yr<br>common<br>Up normal breast | Up HER2 ≤40 yr<br>common<br>Up normal breast | Down HER2 ≤40 yr<br>common<br>Up normal breast | Up LumA ≤40 yr<br>common<br>Up normal breast | Down LumA ≤40 yr<br>common<br>Up normal breast | Up LumB ≤40 yr<br>common<br>Up normal breast | Down LumB ≤40 yr<br>common<br>Up normal breast | Up ≤40 yr<br>Left<br>Tumors |
|---------------------------------|----------------------------------|---------------------------------|-----------------------------------------------|----------------------------------------------|--------------------------------------------|----------------------------------------------|----------------------------------------------|-----------------------------------------------|-------------------------------------------------|----------------------------------------------|------------------------------------------------|----------------------------------------------|------------------------------------------------|----------------------------------------------|------------------------------------------------|-----------------------------|
| GENESET                         | 60                               | 60                              | 22                                            | 27                                           | 60                                         | 60                                           | 58                                           | 132                                           | 194                                             | 161                                          | 552                                            | 102                                          | 85                                             | 94                                           | 94                                             | 124                         |
| Subset gene number              |                                  | 17                              |                                               |                                              | 5                                          | 28                                           | 10                                           | 11                                            | 22                                              | 6                                            | 52                                             | 9                                            | 10                                             | 5                                            | 9                                              | 13                          |
| Genes mapped                    | 38                               | 11                              | 12                                            | 19                                           | 5                                          | 17                                           | 9                                            | 10                                            | 21                                              | 4                                            | 44                                             | 8                                            | 8                                              | 5                                            | 7                                              | 76                          |
| OVERALL SURVIVAL                |                                  |                                 |                                               |                                              |                                            |                                              |                                              |                                               |                                                 |                                              |                                                |                                              |                                                |                                              |                                                |                             |
| p-value significant             | Yes                              | No                              | Yes                                           | Yes                                          | Yes                                        | Yes                                          | No                                           | Yes                                           | Yes                                             | No                                           | Yes                                            | No                                           | No                                             | No                                           | Yes                                            | Yes                         |
| All Tumors                      | 0.82859                          | No                              | 0.56243                                       | <0.00001                                     | 0.00072                                    | 0.02739                                      |                                              | 0.14248                                       | 0.00116                                         |                                              | 0.01896                                        |                                              |                                                |                                              | 3.00E-05                                       | 1.00E-05                    |
| Basal                           |                                  |                                 |                                               |                                              |                                            |                                              |                                              | 0.0512                                        | 0.47058                                         |                                              |                                                |                                              |                                                |                                              |                                                |                             |
| Lum A                           |                                  |                                 |                                               | 0.00141                                      |                                            |                                              |                                              | 0.00624                                       |                                                 |                                              |                                                |                                              |                                                |                                              |                                                |                             |
| Lum B                           |                                  |                                 |                                               |                                              |                                            |                                              |                                              |                                               |                                                 |                                              |                                                |                                              |                                                |                                              |                                                |                             |
| ER+                             |                                  |                                 |                                               | <0.00001                                     | 0.0056                                     | 0.00497                                      |                                              | 0.00431                                       | 0.00424                                         |                                              |                                                |                                              |                                                |                                              | 6.00E-05                                       | <0.00001                    |
| LN-                             |                                  |                                 |                                               | <0.00001                                     |                                            |                                              |                                              |                                               |                                                 |                                              |                                                |                                              |                                                |                                              | 0.00183                                        | 0.00029                     |
| LN+                             |                                  |                                 | 0.00169                                       | 4.00E-05                                     |                                            |                                              |                                              |                                               | 0.00056                                         |                                              | 2.20E-04                                       |                                              |                                                |                                              | 0.00508                                        |                             |
| ER-posLN-neg                    | 0.00204                          |                                 | 0.00783                                       | <0.00001                                     |                                            | 0.00825                                      |                                              | 0.00436                                       |                                                 |                                              |                                                |                                              |                                                |                                              | 0.00207                                        | 4.00E-05                    |
| Pam50 normal-like               |                                  |                                 | 0.00664                                       |                                              |                                            | 0.00335                                      |                                              |                                               |                                                 |                                              |                                                |                                              |                                                |                                              | 0.00016                                        |                             |
| Grade 1                         |                                  |                                 | 0.00754                                       |                                              |                                            |                                              |                                              |                                               |                                                 |                                              |                                                |                                              |                                                |                                              | 0.00384                                        |                             |
| Grade 2                         |                                  |                                 |                                               | <0.00001                                     | 0.00497                                    |                                              |                                              |                                               |                                                 |                                              |                                                |                                              |                                                |                                              | 0.00202                                        | 9.00E-05                    |
| Grade 3                         |                                  |                                 |                                               |                                              |                                            |                                              |                                              |                                               |                                                 |                                              |                                                |                                              |                                                |                                              |                                                |                             |
| RELAPSE FREE SURVIVAL           |                                  |                                 |                                               |                                              |                                            |                                              |                                              |                                               |                                                 |                                              |                                                |                                              |                                                |                                              |                                                |                             |
| p-value significant             | No                               | Yes                             | Yes                                           | Yes                                          | Yes                                        | Yes                                          | Yes                                          | No                                            | Yes                                             | No                                           | Yes                                            | No                                           | No                                             | Yes                                          | Yes                                            | Yes                         |
| All tumors                      | No                               | 0.06891                         | 0.03584                                       | <0.00001                                     | <0.00001                                   | 0.00323                                      | 0.00013                                      | 0.36986                                       | <0.00001                                        |                                              | 1.00E-05                                       |                                              |                                                | No                                           | <0.00001                                       | 0.00294                     |
| Basal                           |                                  | 0.0095                          |                                               |                                              |                                            | 0.01217                                      |                                              |                                               | 0.25768                                         |                                              |                                                |                                              |                                                |                                              |                                                |                             |
| Lum A                           |                                  |                                 |                                               | 0.0031                                       | 0.00031                                    |                                              |                                              |                                               |                                                 |                                              |                                                |                                              |                                                |                                              |                                                |                             |
| Lum B                           |                                  |                                 |                                               | 0.00131                                      |                                            | 0.00583                                      |                                              |                                               |                                                 |                                              |                                                |                                              |                                                |                                              |                                                | 0.00698                     |
| ER+                             |                                  | 0.00828                         |                                               | <0.00001                                     | 6.00E-05                                   | 4.00E-05                                     | 0.00024                                      |                                               | 1.00E-05                                        |                                              | 0.00029                                        |                                              |                                                |                                              | <0.00001                                       | <0.00001                    |
| LN-                             |                                  |                                 |                                               | <0.00001                                     | 0.00094                                    |                                              | 0.00137                                      |                                               | <0.00001                                        |                                              | 0.00196                                        |                                              |                                                |                                              | 9.00E-04                                       | 0.00188                     |
| LN+                             |                                  |                                 | 0.00775                                       | 1.00E-05                                     | 0.00015                                    |                                              |                                              |                                               | <0.00001                                        |                                              | 5.00E-04                                       |                                              |                                                | 0.00498                                      | 3.00E-05                                       | 0.01095                     |
| ER-posLN-neg                    |                                  |                                 |                                               | <0.00001                                     | 0.00488                                    | 0.00452                                      | 0.00342                                      |                                               | 1.00E-05                                        |                                              |                                                |                                              |                                                |                                              | 0.00081                                        | 0.00026                     |
| Pam50 Normal-like               |                                  |                                 |                                               |                                              |                                            |                                              |                                              |                                               |                                                 |                                              |                                                |                                              |                                                |                                              | 0.00064                                        |                             |
| Grade 1                         |                                  |                                 |                                               | 0.00099                                      | 0.00957                                    |                                              |                                              |                                               |                                                 |                                              |                                                |                                              |                                                |                                              | 0.00718                                        |                             |
| Grade 2                         |                                  | 0.00147                         |                                               | <0.00001                                     | 0.00178                                    |                                              | 0.00689                                      |                                               |                                                 |                                              | 0.00023                                        |                                              |                                                |                                              | 0.00013                                        | 0.00111                     |
| Grade 3                         |                                  |                                 |                                               |                                              |                                            |                                              |                                              |                                               | 0.00321                                         |                                              |                                                |                                              |                                                |                                              |                                                |                             |
| CORRELATION with 8 GENE MODULES |                                  |                                 |                                               |                                              |                                            |                                              |                                              |                                               |                                                 |                                              |                                                |                                              |                                                |                                              |                                                |                             |
| P(ANOVA)                        | 0.16715                          | 0.10505                         | 1.00E-05                                      | <0.00001                                     | <0.00001                                   | 0.10291                                      | <0.00001                                     | 0.05231                                       | <0.00001                                        | No                                           | <0.00001                                       | 0.00972                                      | 0.00025                                        | 0.5501                                       | No                                             | <0.00001                    |
| Stroma                          | NS                               | NS                              | pos                                           | neg                                          | pos                                        | NS                                           | pos                                          | neg                                           | pos                                             | NS                                           | pos                                            | neg                                          | NS                                             | pos                                          | NS                                             | neg                         |
| Lipid                           | NS                               | NS                              | pos                                           | neg                                          | pos                                        | NS                                           | pos                                          | neg                                           | pos                                             | NS                                           | pos                                            | neg                                          | pos                                            | NS                                           | NS                                             | neg                         |
| Immune                          | NS                               | NS                              | neg                                           | pos                                          | neg                                        | NS                                           | neg                                          | pos                                           | neg                                             | NS                                           | NS                                             | pos                                          | NS                                             | neg                                          | NS                                             | pos                         |
| Mitotic                         | NS                               | NS                              | neg                                           | pos                                          | neg                                        | NS                                           | neg                                          | NS                                            | neg                                             | NS                                           | neg                                            | pos                                          | neg                                            | neg                                          | NS                                             | pos                         |
| Basal                           | NS                               | NS                              | neg                                           | neg                                          | NS                                         | NS                                           | pos                                          | pos                                           | pos                                             | NS                                           | pos                                            | neg                                          | pos                                            | NS                                           | NS                                             | neg                         |
| Early                           | NS                               | NS                              | pos                                           | neg                                          | pos                                        | NS                                           | pos                                          | neg                                           | pos                                             | NS                                           | pos                                            | neg                                          | pos                                            | NS                                           | NS                                             | neg                         |
| Steroid                         | NS                               | NS                              | pos                                           | neg                                          | pos                                        | NS                                           | pos                                          | neg                                           | pos                                             | NS                                           | pos                                            | neg                                          | pos                                            | NS                                           | NS                                             | neg                         |
| SECRETION                       | SECRETION                        | SECRETION                       | SECRETION                                     | SECRETION                                    | SECRETION                                  | SECRETION                                    | ND                                           | SECRETION                                     | ND                                              | ND                                           | ND                                             | SECRETION                                    | ND                                             | ND                                           | ND                                             | SECRETION                   |
| Breast cancer cells             | 16                               | 6                               | 7                                             | 11                                           | 4                                          | 3                                            |                                              | 4                                             |                                                 |                                              |                                                | 3                                            |                                                |                                              |                                                | 23                          |
| Cancer cells                    | 22                               | 6                               | 12                                            | 13                                           | 4                                          | 4                                            |                                              | 5                                             |                                                 |                                              |                                                | 5                                            |                                                |                                              |                                                | 28                          |
| Urine                           | 19                               | 5                               | 7                                             | 7                                            | 1                                          | 3                                            |                                              | 3                                             |                                                 |                                              |                                                | 2                                            |                                                |                                              |                                                | 24                          |
| Saliva                          | 3                                | 1                               | 2                                             | none                                         | none                                       | none                                         |                                              | 1                                             |                                                 |                                              |                                                | 1                                            |                                                |                                              |                                                | 4                           |
| Breast milk                     | 6                                | 4                               | 3                                             | none                                         | none                                       | 1                                            |                                              | 1                                             |                                                 |                                              |                                                | none                                         |                                                |                                              |                                                | 10                          |
| Plasma                          | 29                               | 7                               | 15                                            | 22                                           | 3                                          | 6                                            |                                              | none                                          |                                                 |                                              |                                                | 8                                            |                                                |                                              |                                                | 47                          |
